# Supplementary material
Source: ML conference proceedings conference paper supplement (https://proceedings.neurips.cc/paper_files/paper/2019/hash/c61aed648da48aa3893fb3eaadd88a7f-Abstract.html)
Supplement: Supplementary file [file c61aed648da48aa3893fb3eaadd88a7f-Supplemental.zip]

---

# Implicit Regularization of Accelerated Methods in Hilbert Spaces

---

**Nicolò Pagliana**  
University of Genoa  
DIMA & MaLGa  
pagliana@dima.unige.it

**Lorenzo Rosasco**  
University of Genoa  
DIBRIS, MaLGa, IIT & MIT  
lrosasco@mit.edu

## Abstract

We study learning properties of accelerated gradient descent methods for linear least-squares in Hilbert spaces. We analyze the implicit regularization properties of Nesterov acceleration and a variant of heavy-ball in terms of corresponding learning error bounds. Our results show that acceleration can provide faster bias decay than gradient descent, but also suffers of a more unstable behavior. As a result acceleration cannot be in general expected to improve learning accuracy with respect to gradient descent, but rather to achieve the same accuracy with reduced computations. Our theoretical results are validated by numerical simulations. Our analysis is based on studying suitable polynomials induced by the accelerated dynamics and combining spectral techniques with concentration inequalities.

## 1 Introduction

The focus on optimization is a major trend in modern machine learning, where efficiency is mandatory in large scale problems [4]. Among other solutions, first order methods have emerged as methods of choice. While these techniques are known to have potentially slow convergence guarantees, they also have low iteration costs, ideal in large scale problems. Consequently the question of accelerating first order methods while keeping their small iteration costs have received much attention, see e.g. [33]. Since machine learning solutions are typically derived minimizing an empirical objective (the training error), most theoretical studies have focused on the error estimated for this latter quantity. However, it has recently become clear that optimization can play a key role from a statistical point of view when the goal is to minimize the expected (test) error. On the one hand, iterative optimization implicitly bias the search for a solution, e.g. converging to suitable minimal norm solutions [27]. On the other hand, the number of iterations parameterize paths of solutions of different complexity [31].

The idea that optimization can implicitly perform regularization has a long history. In the context of linear inverse problems, it is known as *iterative regularization* [11]. It is also an old trick for training neural networks where it is called early stopping [15]. The question of understanding the generalization properties of deep learning applications has recently sparked a lot of attention on this approach, which has been referred to as implicit regularization, see e.g. [13]. Establishing the regularization properties of iterative optimization requires the study of the corresponding expected error by combining optimization and statistical tools. First results in this sense focused on linear least squares with gradient descent and go back to [6, 31], see also [25] and references therein for improvements. Subsequent works have started considering other loss functions [16], multi-linear models [13] and other optimization methods, e.g. stochastic approaches [26, 18, 14].

In this paper, we consider the implicit regularization properties of acceleration. We focus on linear least squares in Hilbert space, because this setting allows to derive sharp results and working in infinite dimension magnify the role of regularization. Unlike in finite dimension learning bounds are

possible only if some form of regularization is considered. In particular, we consider two of the most popular accelerated gradient approaches, based on Nesterov acceleration [22] and (a variant of) the heavy-ball method [24]. Both methods achieve acceleration by exploiting a so called momentum term, which uses not only the previous, but the previous two iterations at each step. Considering a suitable bias-variance decomposition, our results show that accelerated methods have a behavior qualitatively different from basic gradient descent. While the bias decays faster with the number of iterations, the variance increases faster too. The two effect balance out, showing that accelerated methods achieve the same optimal statistical accuracy of gradient descent but they can indeed do this with less computations. Our analysis takes advantage of the linear structures induced by least squares to exploit tools from spectral theory. Indeed, the characterization of both convergence and stability rely on the study of suitable spectral polynomials defined by the iterates. While the idea that accelerated methods can be more unstable, this has been pointed out in [10] in a pure optimization context. Our results quantify this effect from a statistical point of view. Close to our results is the study in [9], where a stability approach is considered to analyze gradient methods for different loss functions [5].

## 2 Learning with (accelerated) gradient methods

Let the input space  $\mathcal{X}$  be a separable Hilbert space (with scalar product  $\langle \cdot, \cdot \rangle$  and induced norm  $\|\cdot\|$ ) and the output space be  $\mathbb{R}$ <sup>1</sup>. Let  $\rho$  be a unknown probability measure on the input-output space  $\mathcal{X} \times \mathbb{R}$ ,  $\rho_{\mathcal{X}}$  the induced marginal probability on  $\mathcal{X}$ , and  $\rho(\cdot|x)$  the conditional probability measure on  $\mathbb{R}$  given  $x \in \mathcal{X}$ . We make the following standard assumption: there exist  $\kappa > 0$  such that

$$\langle x, x' \rangle \leq \kappa^2 \quad \forall x, x' \in \mathcal{X}, \quad \rho_{\mathcal{X}}\text{-almost surely.} \quad (1)$$

The goal of least-squares linear regression is to solve the *expected risk minimization* problem

$$\inf_{w \in \mathcal{X}} \mathcal{E}(w), \quad \mathcal{E}(w) = \int_{\mathcal{X} \times \mathbb{R}} (\langle w, x \rangle - y)^2 d\rho(x, y), \quad (2)$$

where  $\rho$  is known only through the  $n$  i.i.d. samples  $(x_1, y_1), \dots, (x_n, y_n)$ . In the following, we measure the quality of an approximate solution  $\hat{w}$  with the excess risk

$$\mathcal{E}(\hat{w}) - \inf_{\mathcal{X}} \mathcal{E}.$$

The search of a solution is often based on replacing (2) with the empirical risk minimization (ERM)

$$\min_{w \in \mathcal{X}} \hat{\mathcal{E}}(w), \quad \hat{\mathcal{E}}(w) = \frac{1}{n} \sum_{i=1}^n (\langle w, x_i \rangle - y_i)^2. \quad (3)$$

For least squares an ERM solution can be computed in closed form using a direct solver. However, for large problems, iterative solvers are preferable and we next describe the approaches we consider.

First, it is useful to rewrite the ERM with vectors notation. Let  $\mathbf{y} \in \mathbb{R}^n$  with  $(\mathbf{y})_i = y_i$  and  $X : \mathcal{X} \rightarrow \mathbb{R}^n$  s.t.  $(Xw)_i = \langle w, x_i \rangle$  for  $i = 1 \dots, n$ . Here the norm  $\|\cdot\|_n$  is norm in  $\mathbb{R}^n$  multiplied by  $1/\sqrt{n}$ . Let  $X^* : \mathbb{R}^n \rightarrow \mathcal{X}$  be the adjoint of  $X$  defined by  $X^* \mathbf{y} = \frac{1}{n} \sum_{i=1}^n x_i y_i$ . Then, ERM becomes

$$\min_{w \in \mathcal{X}} \hat{\mathcal{E}}(w) = \|Xw - \mathbf{y}\|_n^2. \quad (4)$$

### 2.1 Gradient descent and accelerated methods

Gradient descent serves as a reference approach throughout the paper. For problem (4) it becomes

$$\hat{w}_{t+1} = \hat{w}_t - \alpha X^* (X \hat{w}_t - \mathbf{y}) \quad (5)$$

with initial point  $\hat{w}_0 = 0$  and the step-size  $\alpha$  that satisfy  $\alpha < \frac{1}{\kappa^2}$ <sup>2</sup>. The progress made by gradient descent at each iteration can be slow and the idea behind acceleration is to use the information of the previous directions in order to improves the convergence rate of the algorithm.

<sup>1</sup>As shown in Appendix this choice allows to recover nonparametric kernel learning as a special case.

<sup>2</sup> The step-size  $\alpha$  is the step-size at the  $t$ -th iteration and satisfies the condition  $0 < \alpha \|X\|_{op}^2 < 1$ , where  $\|\cdot\|_{op}$  denotes the operatorial norm. Since the operator  $X$  is bounded by  $\kappa$  (which means  $\|X\|_{op} \leq \kappa$ ) it is sufficient to assume  $\alpha < \frac{1}{\kappa^2}$ .

## Heavy-ball

Heavy-ball is a popular accelerated method that adds the *momentum*  $\hat{w}_t - \hat{w}_{t-1}$  at each iteration

$$\hat{w}_{t+1} = \hat{w}_t - \alpha X^* (X \hat{w}_t - \mathbf{y}) + \beta(\hat{w}_t - \hat{w}_{t-1}) \quad (6)$$

with  $\alpha, \beta \geq 0$ , the case  $\beta = 0$  reduces to gradient descent. In the quadratic case we consider it is also called Chebyshev iterative method. The optimization properties of heavy-ball have been studied extensively [24, 32]. Here, we consider the following variant. Let  $\nu > 1$ , consider the varying parameter heavy-ball replacing  $\alpha, \beta$  in (6) with  $\alpha_{t+1}, \beta_{t+1}$  defined as:

$$\alpha_t = \frac{4}{\kappa^2} \frac{(2t + 2\nu - 1)(t + \nu - 1)}{(t + 2\nu - 1)(2t + 4\nu - 1)} \quad \beta_t = \frac{(t - 1)(2t - 3)(2t + 2\nu - 1)}{(t + 2\nu - 1)(2t + 4\nu - 1)(2t + 2\nu - 3)},$$

for  $t > 0$  and with initialization  $\hat{w}_{-1} = \hat{w}_0 = 0$ ,  $\alpha_1 = \frac{1}{\kappa^2} \frac{4\nu+2}{4\nu+1}$ ,  $\beta_1 = 0$ . With this choice and considering the least-squares problem this algorithm is known as  $\nu$ -method in the inverse problem literature (see e.g. [11]). This seemingly complex parameters' choice allows to relates the approach to suitable orthogonal polynomials recursion as we discuss later.

## Nesterov acceleration

The second form of gradient acceleration we consider is the popular Nesterov acceleration [22]. In our setting, it corresponds to the iteration

$$\hat{w}_{t+1} = \hat{v}_t - \alpha X^* (X \hat{v}_t - \mathbf{y}), \quad \hat{v}_t = \hat{w}_t + \beta_t (\hat{w}_t - \hat{w}_{t-1}) \quad (7)$$

with the two initial points  $\hat{w}_{-1} = \hat{w}_0 = 0$ , and the sequence  $\beta_t$  chosen as

$$\beta_t = \frac{t - 1}{t + \beta}, \quad \beta \geq 1. \quad (8)$$

Differently from heavy-ball, Nesterov acceleration uses the momentum term also in the evaluation of the gradient. Also in this case optimization results are well known [1, 29].

Here, as above, optimization results refer to solving ERM (3), (4), whereas in the following we study to which extent the above iterations can be used to minimize the expected error (2). In the next section, we discuss a spectral approach which will be instrumental towards this goal.

## 3 Spectral filtering for accelerated methods

Least squares allows to consider spectral approaches to study the properties of gradient methods for learning. We illustrate these ideas for gradient descent before considering accelerated methods.

### Gradient descent as spectral filtering

Note that by a simple (and classical) induction argument, gradient descent can be written as

$$\hat{w}_t = \alpha \sum_{j=0}^{t-1} (I - \alpha \hat{\Sigma})^j X^* \mathbf{y}.$$

Equivalently using spectral calculus

$$\hat{w}_t = g_t(\hat{\Sigma}) X^* \mathbf{y}, \quad \text{with } \hat{\Sigma} = X^* X,$$

where  $g_t$  are the polynomials  $g_t(\sigma) = \alpha \sum_{j=0}^{t-1} (I - \alpha \sigma)^j$  for all  $\sigma \in (0, \kappa^2]$  and  $t \in \mathbb{N}$ . Note that, the polynomials  $g_t$  are bounded by  $\alpha t$ . A first observation is that  $g_t(\sigma)\sigma$  converges to 1 as  $t \rightarrow \infty$ , since  $g_t(\sigma)$  converges to  $\frac{1}{\sigma}$ . A second observation is that the *residual polynomials*  $r_t(\sigma) = 1 - \sigma g_t(\sigma)$ , which are all bounded by 1, control ERM convergence since,

$$\|X \hat{w}_t - \mathbf{y}\|_n = \|X g_t(\hat{\Sigma}) X^* \mathbf{y} - \mathbf{y}\|_n = \|g_t(\hat{\Sigma}) \hat{\Sigma} \mathbf{y} - \mathbf{y}\|_n = \|r_t(\hat{\Sigma}) \mathbf{y}\|_n \leq \|r_t(\hat{\Sigma})\|_{op} \|\mathbf{y}\|_n.$$

In particular, if  $\mathbf{y}$  is in the range of  $\hat{\Sigma}^r$  for some  $r > 0$  (source condition on  $\mathbf{y}$ ) improved convergence rates can be derived noting that by an easy calculation

$$|r_t(\sigma)\sigma^q| \leq \left(\frac{q}{\alpha}\right)^q \left(\frac{1}{t}\right)^q.$$

As we show in Section 4, considering the polynomials  $g_t$  and  $r_t$  allows to study not only ERM but also expected risk minimization (2), by relating gradient methods to their infinite sample limit. Further, we show how similar reasoning hold for accelerated methods. In order to do so, it useful to first define the characterizing properties of  $g_t$  and  $r_t$ .

### 3.1 Spectral filtering

The following definition abstracts the key properties of the function  $g_t$  and  $r_t$  often called spectral filtering function [2]. Following the classical definition we replace  $t$  with a generic parameter  $\lambda$ .

**Definition 1.**

The family  $\{g_\lambda\}_{\lambda \in (0,1]}$  is called *spectral filtering function* if the following conditions hold:

- (i) There exist a constant  $E < +\infty$  such that, for any  $\lambda \in (0, 1]$

$$\sup_{\sigma \in (0, \kappa^2]} |g_\lambda(\sigma)| \leq \frac{E}{\lambda}. \quad (9)$$

- (ii) Let  $r_\lambda(\sigma) = 1 - \sigma g_\lambda(\sigma)$  there exist a constant  $F_0$  such that, for any  $\lambda \in (0, 1]$

$$\sup_{\sigma \in (0, \kappa^2]} |r_\lambda(\sigma)| \leq F_0. \quad (10)$$

**Definition 2. (Qualification)**

The qualification of the spectral filtering function  $\{g_\lambda\}_\lambda$  is the maximum parameter  $q$  such that for any  $\lambda \in (0, 1]$  there exist a constant  $F_q$  such that

$$\sup_{\sigma \in (0, \kappa^2]} |r_\lambda(\sigma)\sigma^q| \leq F_q \lambda^q. \quad (11)$$

Moreover we say that a filtering function has qualification  $\infty$  if (11) holds for every  $q > 0$ .

Methods with finite qualification might have slow convergence rates in certain regimes. The smallest the qualification the worse the rates can be.

The discussion in the previous section shows that gradient descent defines a spectral filtering function where  $\lambda = 1/t$ . More precisely, the following holds.

**Proposition 1.** Assume  $\lambda = \frac{1}{t}$  for  $t \in \mathbb{N}$ , then the polynomials  $g_t$  related to the gradient descent iterates, defined in (5), are a filtering function with parameters  $E = \alpha$  and  $F_0 = 1$ . Moreover it has qualification  $\infty$  with parameters  $F_q = (q/\alpha)^q$ .

The above result is classical and we report a proof in the appendix for completeness. Next, we discuss analogous results for accelerate methods and then compare the different spectral filtering functions.

### 3.2 Spectral filtering for accelerated methods

For the heavy-ball (6) the following result holds

**Proposition 2.** Assume  $\kappa \leq 1$ , let  $\nu > 0$  and  $\lambda = \frac{1}{t^2}$  for  $t \in \mathbb{N}$ , then the polynomials  $g_t$  related to heavy-ball method (6) are a filtering function with parameters  $E = 2$  and  $F_0 = 1$ . Moreover there exist a positive constant  $c_\nu < +\infty$  such that the  $\nu$ -method has qualification  $\nu$ .

The proof of the above proposition follows combining several intermediate results from [11]. The key idea is to show that the residual polynomials defined by heavy-ball iteration form a sequence of orthogonal polynomials with respect to the weight function

$$\omega_\nu(\sigma) = \frac{\sigma^{2\nu}}{\sigma^{\frac{1}{2}}(1-\sigma)^{\frac{1}{2}}},$$

which is a so called shifted Jacobi weight. Results from orthogonal polynomials can then be used to characterize the corresponding spectral filtering function.

The following proposition considers Nesterov acceleration.

**Proposition 3.** Assume  $\lambda = 1/t^2$ , then the polynomials  $g_t$  related to Nesterov iterates (7) are a filtering function with constants  $E = 2\alpha$  and  $F_0 = 1$ . Moreover the qualification of this method is at least  $1/2$  with constants  $F_q = \left(\frac{\beta^2}{\alpha}\right)^q$ .

Filtering properties of the Nesterov iteration (7) have been studied recently in the context of inverse problems [23]. In the appendix 7.3 we provide a simplified proof based on studying the properties of suitable discrete dynamical systems defined by the Nesterov iteration (7).

### 3.3 Comparing the different filter functions

We summarize the properties of the spectral filtering function of the various methods for  $\kappa = 1$ .

| Method           | E | F <sub>0</sub> | F <sub>q</sub>          | Qualification |
|------------------|---|----------------|-------------------------|---------------|
| Gradient descent | 1 | 1              | $q^q$                   | $\infty$      |
| Heavy-ball       | 2 | 1              | $c_\nu \quad (q = \nu)$ | $\nu$         |
| Nesterov         | 2 | 1              | $\beta^{2q}$            | $\geq 1/2$    |

The main observation is that the properties of the spectral filtering functions corresponding to the different iterations depend on  $\lambda = 1/t$  for gradient descent, but on  $\lambda = 1/t^2$  for the accelerated methods. As we see in the next section this leads to substantially different learning properties. Further we can see that gradient descent is the only algorithm with qualification  $\infty$ , even if the parameter  $F_q = q^q$  can be very large. The accelerated methods seem to have smaller qualification. In particular, the heavy-ball method can attain a high qualification, depending on  $\nu$ , but the constant  $c_\nu$  is unknown and could be large. For Nesterov accelerated method, the qualification is at least  $1/2$  and it's an open question whether this bound is tight or higher qualification can be attained.

In the next section, we show how the properties of the spectral filtering functions can be exploited to study the excess risk of the corresponding iterations.

## 4 Learning properties for accelerated methods

We first consider a basic scenario and then a more refined analysis leading to a more general setting and potentially faster learning rates.

### 4.1 Attainable case

Consider the following basic assumption.

**Assumption 1.** Assume there exist  $M > 0$  such that  $|y| < M$   $\rho$ -almost surely and  $w^* \in \mathcal{X}$  such that  $\mathcal{E}(w^*) = \inf_{\mathcal{X}} \mathcal{E}$ .

Then the following result can be derived.

**Theorem 1.** Under Assumption 1, let  $\hat{w}_t^{GD}$  and  $\hat{w}_t^{acc}$  be the  $t$ -th iterations respectively of gradient descent (5) and an accelerated version given by (6) or (7). Assuming the sample-size  $n$  to be large enough and let  $\delta \in (0, 1/2)$  then there exist two positive constant  $C_1$  and  $C_2$  such that with probability at least  $1 - \delta$

$$\begin{aligned} \mathcal{E}(\hat{w}_t^{GD}) - \inf_{\mathcal{H}} \mathcal{E} &\leq C_1 \left( \frac{1}{t} + \frac{t}{n} \right) \log^2 \frac{2}{\delta} \\ \mathcal{E}(\hat{w}_t^{acc}) - \inf_{\mathcal{H}} \mathcal{E} &\leq C_2 \left( \frac{1}{t^2} + \frac{t^2}{n} \right) \log^2 \frac{2}{\delta}. \end{aligned}$$

where the constants  $C_1$  and  $C_2$  do not depend on  $n, t, \delta$ , but depend on the chosen optimization method.

Moreover by choosing the stopping rules  $t^{GD} = O(n^{1/2})$  and  $t^{acc} = O(n^{1/4})$  both algorithms have learning rate of order  $\frac{1}{\sqrt{n}}$ .

The proof of the above results is given in the appendix and the novel part is the one concerning accelerated methods, particularly Nesterov acceleration. The result shows how the number of iteration

controls the learning properties both for gradient descent and accelerated gradient. In this sense implicit regularization occurs in all these approaches. For any  $t$  the error is split in two contributions. Inspecting the proof it is easy to see that, the first term in the bound comes from the convergence properties of the algorithm with infinite data. Hence the optimization error translates into a bias term. The decay for accelerated method is much faster than for gradient descent. The second term arises from comparing the empirical iterates with their infinite sample (population) limit. It is a variance term depending on the sampling in the data and hence decreases with the sample size. For all methods, this term increases with the number of iterations, indicating that the empirical and population iterations are increasingly different. However, the behavior is markedly worse for accelerated methods. The benefit of acceleration seems to be balanced out by this more unstable behavior. In fact, the benefit of acceleration is apparent balancing the error terms to obtain a final bound. The obtained bound is the same for gradient descent and accelerated methods, and is indeed optimal since it matches corresponding lower bounds [3, 7]. However, the number of iterations needed by accelerated methods is the square root of those needed by gradient descent, indicating a substantial computational gain can be attained. Next we show how these results can be generalized to a more general setting, considering both weaker and stronger assumptions, corresponding to harder or easier learning problems.

## 4.2 More refined result

Theorem 1 is a simplified version of the more general result that we discuss in this section. We are interested in covering also the non-attainable case, that is when there is no  $w^* \in \mathcal{X}$  such that  $\mathcal{E}(w^*) = \inf_{\mathcal{X}} \mathcal{E}$ . In order to cover this case we have to introduce several more definitions and notations. In Appendix 8.2 we give a more detailed description of the general setting. Consider the space  $L^2_{\rho_{\mathcal{X}}}$  of the square integrable functions with the norm  $\|f\|_{\rho_{\mathcal{X}}}^2 = \int_{\mathcal{X}} f(x)^2 d\rho_{\mathcal{X}}(x)$  and extend the expected risk to  $L^2_{\rho_{\mathcal{X}}}$  defining  $\mathcal{E}(f) = \int_{\mathcal{X} \times \mathbb{R}} (f(x) - y)^2 d\rho(x, y)$ . Let  $\mathcal{H} \subseteq L^2_{\rho_{\mathcal{X}}}$  be the hypothesis space of functions such that  $f(x) = \langle w, x \rangle \rho_{\mathcal{X}}$  almost surely. Recall that, the minimizer of the expected risk over  $L^2_{\rho_{\mathcal{X}}}$  is the regression function  $f_{\rho} = \int_{\mathcal{X}} y d\rho(y|x)$ . The projection  $f_{\mathcal{H}}$  over the closure of the hypothesis space  $\mathcal{H}$  is defined as

$$f_{\mathcal{H}} = \arg \min_{g \in \overline{\mathcal{H}}} \|g - f_{\rho}\|_{\rho_{\mathcal{X}}} .$$

Let  $L : L^2_{\rho_{\mathcal{X}}} \rightarrow L^2_{\rho_{\mathcal{X}}}$  be the integral operator

$$Lf(x) = \int_{\mathcal{X}} f(x') \langle x, x' \rangle d\rho_{\mathcal{X}}(x') .$$

The first assumption we consider concern the moments of the output variable and is more general than assuming the output variable  $y$  to be bounded as assumed before.

**Assumption 2.** *There exist positive constant  $Q$  and  $M$  such that for all  $\mathbb{N} \ni l \geq 2$ ,*

$$\int_{\mathbb{R}} |y|^l d\rho(y|x) \leq \frac{1}{2} l! M^{l-2} Q^2 \quad \rho_{\mathcal{X}} \text{ almost surely.}$$

This assumption is standard and satisfied in classification or regression with well behaved noise. Under this assumption the regression function  $f_{\rho}$  is bounded almost surely

$$|f_{\rho}(x)| \leq \int_{\mathbb{R}} |y| d\rho(y|x) \leq \left( \int_{\mathbb{R}} |y|^2 d\rho(y|x) \right)^{1/2} \leq Q . \quad (12)$$

The next assumptions are related to the regularity of the target function  $f_{\mathcal{H}}$ .

**Assumption 3.**

*There exist a positive constant  $B$  such that the target function  $f_{\mathcal{H}}$  satisfy*

$$\int_{\mathcal{X}} (f_{\mathcal{H}}(x) - f_{\rho}(x))^2 x \otimes x d\rho_{\mathcal{X}}(x) \preceq B^2 \Sigma .$$

This assumption is needed to deal with the misspecification of the model. The last assumptions quantify the regularity of  $f_{\mathcal{H}}$  and the size (capacity) of the space  $\mathcal{H}$ .

**Assumption 4.**

There exist  $g_0 \in L_{\rho_X}^2$  and  $r > 0$  such that

$$f_{\mathcal{H}} = L^r g_0, \quad \text{with } \|g_0\|_{\rho_X} \leq R.$$

Moreover we assume that there exist  $\gamma \geq 1$  and a positive constant  $c_\gamma$  such that the effective dimension

$$\mathcal{N}(\lambda) = \text{Tr} \left( L (L + \lambda I)^{-1} \right) \leq c_\gamma \lambda^{-\frac{1}{\gamma}}.$$

The assumption on  $\mathcal{N}(\lambda)$  is always true for  $\gamma = 1$  and  $c_1 = \kappa^2$  and it's satisfied when the eigenvalues  $\sigma_i$  of  $L$  decay as  $i^{-\gamma}$ . We recall that, the space  $\mathcal{H}$  can be characterized in terms of the operator  $L$ , indeed

$$\mathcal{H} = L^{1/2} (L_{\rho_X}^2).$$

Hence, the non-attainable corresponds to considering  $r < 1/2$ .

**Theorem 2.** Under Assumption 2, 3, 4, let  $\hat{w}_t^{GD}$  and  $\hat{w}_t^{acc}$  be the  $t$ -th iterations of gradient descent (5) and an accelerated version given by (6) or (7) respectively. Assuming the sample-size  $n$  to be large enough, let  $\delta \in (0, 1/2)$  and assuming  $r$  to be smaller than the qualification of the considered algorithm (and equal to  $1/2$  in the case of Nesterov accelerated methods), then there exist two positive constant  $C_1$  and  $C_2$  such that with probability at least  $1 - \delta$

$$\begin{aligned} \mathcal{E}(\hat{w}_t^{GD}) - \inf_{\mathcal{H}} \mathcal{E} &\leq C_1 \left( \frac{1}{t^{2r}} + \frac{t^{\frac{1}{\gamma}}}{n} \right) \log^2 \frac{2}{\delta} \\ \mathcal{E}(\hat{w}_t^{acc}) - \inf_{\mathcal{H}} \mathcal{E} &\leq C_2 \left( \frac{1}{t^{4r}} + \frac{t^{\frac{2}{\gamma}}}{n} \right) \log^2 \frac{2}{\delta}. \end{aligned}$$

where the constants  $C_1$  and  $C_2$  do not depend on  $n, t, \delta$ , but depend on the chosen optimization.

Choosing the stopping rules  $t^{GD} = O(n^{\frac{\gamma}{2\gamma r + 1}})$  and  $t^{acc} = O(n^{\frac{\gamma}{4\gamma r + 2}})$  both gradient descent and accelerated methods achieve a learning rate of order  $O\left(n^{\frac{-2\gamma r}{2\gamma r + 1}}\right)$ .

The only reason why we do not consider  $r < 1/2$  in the analysis of Nesterov accelerated methods is that our proof require the qualification of the method to be larger than 1 for technical reasons. However we think that our result can be extended to that case, furthermore we think Nesterov qualification to be larger than 1, however it's an open question whether higher qualification can be attained. The proof of the above result is given in the appendix. The general structure of the bound is the same as in the basic setting, which is now recovered as a special case. However, in this more general form, the various terms in the bound depend now on the regularity assumptions on the problem. In particular, the variance depends on the effective dimension behavior, e.g. on the eigenvalue decay, while the bias depend on the regularity assumption on  $f_{\mathcal{H}}$ . The general comparison between gradient descent and accelerated methods follows the same line as in the previous section. Faster bias decay of accelerated methods is contrasted by a more unstable behavior. As before, the benefit of accelerated methods becomes clear when deriving optimal stopping time and corresponding learning bound: they achieve the accuracy of gradient methods but in considerable less time. While heavy-ball and Nesterov have again similar behaviors, here a subtle difference resides in their different qualifications, which in principle lead to different behavior for easy problems, that is for large  $r$  and  $\gamma$ . In this regime, gradient descent could work better since it has infinite qualification. For problems in which  $r < 1/2$  and  $\gamma = 1$  the rates are worse than in the basic setting, hence these problems are hard.

**4.3 Related work**

In the convex optimization framework a similar phenomenon was pointed out in [10] where they introduce the notion of inexact first-order oracle and study the behaviour of several first-order methods of smooth convex optimization with such oracle. In particular they show that the superiority of accelerated methods over standard gradient descent is no longer absolute when an inexact oracle is used. This because acceleration suffer from the accumulation of the errors committed by the inexact oracle. A relevant result on the generalization properties of learning algorithm is [5] in which they introduce the notion of *uniform* stability and use it to obtain generalization error bounds



for regularization based learning algorithms. Recently, to show the effectiveness of commonly used optimization algorithms in many large-scale learning problems, algorithmic stability has been established for stochastic gradient methods [14], as well as for any algorithm in situations where global minima are approximately achieved [8]. For Nesterov’s accelerated gradient descent and heavy-ball method, [9] provide stability upper bounds for quadratic loss function in a finite dimensional setting. All these approaches focus on the definition of uniform stability given in [5]. Our approach to the stability of a learning algorithm is based on the study of filtering properties of accelerated methods together with concentration inequalities, we obtain upper bounds on the generalization error for quadratic loss in a infinite dimensional Hilbert space and generalize the bounds obtained in [9] by considering different regularity assumptions and by relaxing the hypothesis of the existence of a minimizer of the expected risk on the hypothesis space.

## 5 Numerical simulation

In this section we show some numerical simulations to validate our results. We want to simulate the case in which the eigenvalues  $\sigma_i$  of the operator  $L$  are  $\sigma_i = i^{-\gamma}$  for some  $\gamma \leq 1$  and the non-attainable case  $r < 1/2$ . In order to do this we observe that if we consider the kernel setting over a finite space  $\mathcal{Z} = \{z_1, \dots, z_n\}$  of size  $N$  with the uniform probability distribution  $\rho_{\mathcal{Z}}$ , then the space  $L^2(\mathcal{Z}, \rho_{\mathcal{Z}})$  becomes  $\mathbb{R}^N$  with the usual scalar product multiplied by  $1/N$ . the operator  $L$  becomes a  $N \times N$  matrix which entries are  $L_{i,j} = K(z_i, z_j)$  for every  $i, j \in \{1, \dots, N\}$ , where  $K$  is the kernel, which is fixed by the choice of the matrix  $L$ . We build the matrix  $L = UDU^T$  with  $U \in \mathbb{R}^{N \times N}$  orthogonal matrix and  $D$  diagonal matrix with entries  $D_{i,i} = i^{-\gamma}$ . The source condition becomes  $f_{\mathcal{H}} = L^r g_0$  for some  $g_0 \in \mathbb{R}^N, r > 0$ . We simulate the observed output as  $y = f_{\mathcal{H}} + \mathcal{N}(0, \sigma)$  where  $\mathcal{N}(0, \sigma)$  is the standard normal distribution of variance  $\sigma^2$ . The sampling operation can be seen as extracting  $n$  indices  $i_1, \dots, i_n$  and building the kernel matrix  $\hat{K}_{j,k} = K(z_{i_j}, z_{i_k})$  and the noisy labels  $\hat{y}_j = y_{i_j}$  for every  $j, k \in \{1, \dots, n\}$ . The Representer Theorem ensure that we can built our estimator  $\hat{f} \in \mathbb{R}^N$  as  $\hat{f}(z) = \sum_{j=1}^n K(z, z_{i_j}) c_j$  where the vector  $c$  depends on the chosen optimization algorithm and takes the form  $c = g_t(\hat{K})y$ . The excess risk of the estimator  $\hat{f}$  is given by  $\|\hat{f} - f_{\mathcal{H}}\|_{L_{\mathcal{Z}}^2}^2$ .

For every algorithm considered, we run 50 repetitions, in which we sample the data-space and compute the error  $\|\hat{f}_t - f_{\mathcal{H}}\|_{L_{\mathcal{Z}}^2}^2$ , where  $\hat{f}_t$  represents the estimator related to the  $t$ -th iteration of one of the considered algorithms, and in the end we compute the mean and the variance of those errors. In Figure 1 we simulate the error of all the algorithms considered for both attainable and non-attainable case. We observe that both heavy-ball and Nesterov acceleration provides faster convergence rates with respect to gradient descent method, but the learning accuracy is not improved. We observe that the accelerated methods considered show similar behavior and that for “easy problem” (large  $r$ ) that gradient descent can exploits its higher qualification and perform similarly to the accelerated methods.

In Figure 2 we show the test error related to the real dataset *pumadyn8nh* (available at <https://www.dcc.fc.up.pt/ltorgo/Regression/puma.html>). Even in this case we can observe the behaviors shown in our theoretical results.

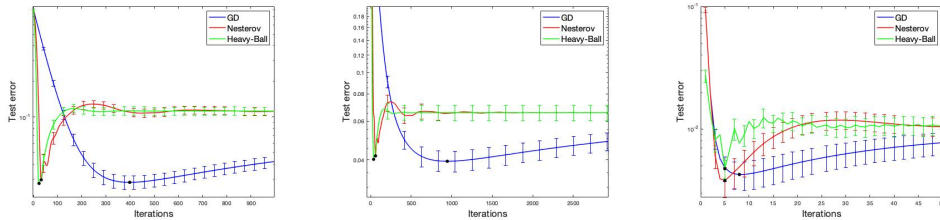

Fig. 1: Mean and variance of error  $\|\hat{f}_t - f_{\mathcal{H}}\|_N^2$  for the  $t$ -th iteration of gradient descent (GD), Nesterov accelerated algorithm and heavy-ball ( $\nu = 1$ ). Black dots shows the absolute minimum of the curves. The parameters are chosen  $N = 10^4, n = 10^2, \gamma = 1, \sigma = 0.5$ . We show the attainable case ( $r = 1/2$ ) in the left, the “hard case” ( $r = 0.1 < 1/2$ ) in the center and the “easy case” ( $r > 1/2$ ) in the right.



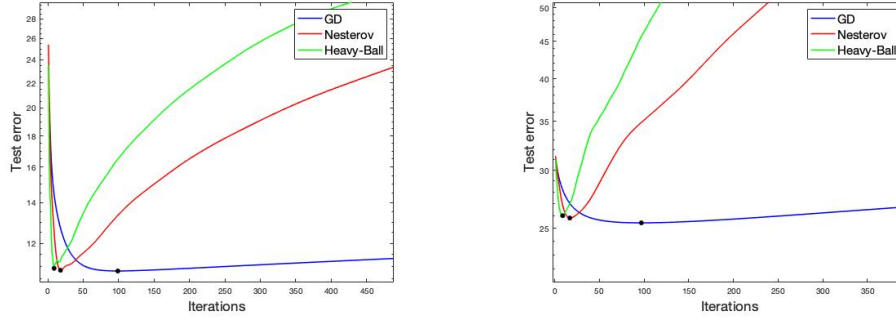

Fig. 2: Test error on the real dataset *pumadyn8nh* using gradient descent (GD), Nesterov accelerated algorithm and heavy-ball. In the left we use a gaussian kernel with  $\sigma = 1.2$  and in the right a polynomial kernel of degree 9.

## 6 Conclusion

In this paper, we have considered the implicit regularization properties of accelerated gradient methods for least squares in Hilbert space. Using spectral calculus we have characterized the properties of the different iterations in terms of suitable polynomials. Using the latter, we have derived error bounds in terms of suitable bias and variance terms. The main conclusion is that under the considered assumptions accelerated methods have smaller bias but also larger variance. As a byproduct they achieve the same accuracy of vanilla gradient descent but with much fewer iterations. Our study opens a number of potential theoretical and empirical research directions. From a theory point of view, it would be interesting to consider other learning regimes, for examples classification problems, different loss functions or other regularity assumptions beyond classical nonparametric assumptions, e.g. misspecified models and fast eigenvalues decays (Gaussian kernel). From an empirical point of view it would be interesting to do a more thorough investigation on a larger number of simulated and real data-sets of varying dimension.

## Acknowledgments

This material is based upon work supported by the Center for Brains, Minds and Machines (CBMM), funded by NSF STC award CCF-1231216, and the Italian Institute of Technology. We gratefully acknowledge the support of NVIDIA Corporation for the donation of the Titan Xp GPUs and the Tesla k40 GPU used for this research. L. R. acknowledges the financial support of the AFOSR projects FA9550-17-1-0390 and BAA-AFRL-AFOSR-2016-0007 (European Office of Aerospace Research and Development), and the EU H2020-MSCA-RISE project NoMADS - DLV-777826. N.P. would like to thank Murata Tomoya for the useful observations.

## References

- [1] Hedy Attouch, Zaki Chbani, and Hassan Riahi. Rate of convergence of the nesterov accelerated gradient method in the subcritical case  $\alpha \leq 3$ . *ESAIM: Control, Optimisation and Calculus of Variations*, 25:2, 2019.
- [2] Luca Baldassarre, Lorenzo Rosasco, Annalisa Barla, and Alessandro Verri. Multi-output learning via spectral filtering. *Machine learning*, 87(3):259–301, 2012.
- [3] Gilles Blanchard and Nicole Mücke. Optimal rates for regularization of statistical inverse learning problems. *Foundations of Computational Mathematics*, 18(4):971–1013, Aug 2018.
- [4] Léon Bottou and Olivier Bousquet. The tradeoffs of large scale learning. In *Advances in neural information processing systems*, pages 161–168, 2008.
- [5] Olivier Bousquet and André Elisseeff. Stability and generalization. *Journal of machine learning research*, 2(Mar):499–526, 2002.

- [6] Peter Bühlmann and Bin Yu. Boosting with the  $l_2$  loss: regression and classification. Journal of the American Statistical Association, 98(462):324–339, 2003.
- [7] Andrea Caponnetto and Ernesto De Vito. Optimal rates for the regularized least-squares algorithm. Foundations of Computational Mathematics, 7(3):331–368, 2007.
- [8] Zachary Charles and Dimitris Papailiopoulos. Stability and generalization of learning algorithms that converge to global optima. arXiv preprint arXiv:1710.08402, 2017.
- [9] Yuansi Chen, Chi Jin, and Bin Yu. Stability and convergence trade-off of iterative optimization algorithms. arXiv preprint arXiv:1804.01619, 2018.
- [10] Olivier Devolder, François Glineur, and Yurii Nesterov. First-order methods of smooth convex optimization with inexact oracle. Mathematical Programming, 146(1-2):37–75, 2014.
- [11] Heinz Werner Engl, Martin Hanke, and Andreas Neubauer. Regularization of inverse problems, volume 375. Springer Science & Business Media, 1996.
- [12] Junichi Fujii, Masatoshi Fujii, Takayuki Furuta, and Ritsuo Nakamoto. Norm inequalities equivalent to heinz inequality. Proceedings of the American Mathematical Society, 118(3):827–830, 1993.
- [13] Suriya Gunasekar, Jason D Lee, Daniel Soudry, and Nati Srebro. Implicit bias of gradient descent on linear convolutional networks. In Advances in Neural Information Processing Systems, pages 9461–9471, 2018.
- [14] Moritz Hardt, Benjamin Recht, and Yoram Singer. Train faster, generalize better: Stability of stochastic gradient descent. arXiv preprint arXiv:1509.01240, 2015.
- [15] Yann A LeCun, Léon Bottou, Genevieve B Orr, and Klaus-Robert Müller. Efficient backprop. In Neural networks: Tricks of the trade, pages 9–48. Springer, 2012.
- [16] Junhong Lin, Raffaello Camoriano, and Lorenzo Rosasco. Generalization properties and implicit regularization for multiple passes sgm. In International Conference on Machine Learning, pages 2340–2348, 2016.
- [17] Junhong Lin and Volkan Cevher. Optimal convergence for distributed learning with stochastic gradient methods and spectral-regularization algorithms. stat, 1050:22, 2018.
- [18] Junhong Lin and Lorenzo Rosasco. Optimal learning for multi-pass stochastic gradient methods. In Advances in Neural Information Processing Systems, pages 4556–4564, 2016.
- [19] Junhong Lin, Alessandro Rudi, Lorenzo Rosasco, and Volkan Cevher. Optimal rates for spectral algorithms with least-squares regression over hilbert spaces. Applied and Computational Harmonic Analysis, 2018.
- [20] Peter Mathé and Sergei Pereverzev. Regularization of some linear ill-posed problems with discretized random noisy data. Mathematics of Computation, 75(256):1913–1929, 2006.
- [21] Peter Mathé and Sergei V Pereverzev. Moduli of continuity for operator valued functions. Numerical Functional Analysis and Optimization, 23(5-6):623–631, 2002.
- [22] Yurii E Nesterov. A method for solving the convex programming problem with convergence rate  $o(1/k^2)$ . In Dokl. akad. nauk Sssr, volume 269, pages 543–547, 1983.
- [23] Andreas Neubauer. On nesterov acceleration for landweber iteration of linear ill-posed problems. Journal of Inverse and Ill-posed Problems, 25(3):381–390, 2017.
- [24] Boris T Polyak. Introduction to optimization. Technical report, 1987.

- [25] Garvesh Raskutti, Martin J Wainwright, and Bin Yu. Early stopping and non-parametric regression: an optimal data-dependent stopping rule. The Journal of Machine Learning Research, 15(1):335–366, 2014.
- [26] Lorenzo Rosasco and Silvia Villa. Learning with incremental iterative regularization. In Advances in Neural Information Processing Systems, pages 1630–1638, 2015.
- [27] Daniel Soudry, Elad Hoffer, Mor Shpigel Nacson, Suriya Gunasekar, and Nathan Srebro. The implicit bias of gradient descent on separable data. The Journal of Machine Learning Research, 19(1):2822–2878, 2018.
- [28] Ingo Steinwart and Andreas Christmann. Support vector machines. Springer Science & Business Media, 2008.
- [29] Weijie Su, Stephen Boyd, and Emmanuel Candes. A differential equation for modeling nesterov’s accelerated gradient method: Theory and insights. In Advances in Neural Information Processing Systems, pages 2510–2518, 2014.
- [30] Gabor Szeg. Orthogonal polynomials, volume 23. American Mathematical Soc., 1939.
- [31] Yuan Yao, Lorenzo Rosasco, and Andrea Caponnetto. On early stopping in gradient descent learning. Constructive Approximation, 26(2):289–315, 2007.
- [32] SK Zavriev and FV Kostyuk. Heavy-ball method in nonconvex optimization problems. Computational Mathematics and Modeling, 4(4):336–341, 1993.
- [33] Chiyuan Zhang, Samy Bengio, Moritz Hardt, Benjamin Recht, and Oriol Vinyals. Understanding deep learning requires rethinking generalization. arXiv preprint arXiv:1611.03530, 2016.

## 7 Appendix: regularization properties for accelerated algorithms

### 7.1 Regularization properties for gradient descent

#### *Proof of Proposition 1*

*Proof.*

Since  $\sigma \in (0, \kappa^2]$  and  $\alpha$  is chosen such that  $\alpha \leq \frac{1}{\kappa^2}$  it holds that  $(1 - \alpha\sigma) \leq 1$  for every and so for the definitions of  $g_t$  and  $r_t$  it holds

$$\begin{aligned} \sup_{\sigma \in (0, \kappa^2]} |g_t(\sigma)| &\leq \alpha t \\ \sup_{\sigma \in (0, \kappa^2]} |r_t(\sigma)| &\leq 1 \end{aligned}$$

hence Landweber polynomials verify (9) and (10) with  $E = \alpha$  and  $F_0 = 1$ .

For what concern the qualification of this method, for every  $q \geq 0$  the maximum of the function  $r_t(\sigma)\sigma^q$  is attained at  $\sigma = \frac{1}{\alpha} \frac{q}{t+q}$ , so we get

$$0 \leq r_t(\sigma)\sigma^q \leq \left(\frac{1}{\alpha}\right)^q \left(\frac{q}{t+q}\right)^q \leq \left(\frac{q}{\alpha}\right)^q \left(\frac{1}{t}\right)^q,$$

hence we prove (11) for every  $q \geq 0$  with  $F_q = \left(\frac{q}{\alpha}\right)^q$  and complete the proof.  $\square$

### 7.2 Regularization properties for heavy-ball

For the sake of simplicity assume  $\kappa \leq 1$ . Before proceeding with the analysis of the  $\nu$ -method we state one lemma, which will be useful in the following.

**Lemma 1.**

*Let  $g_t$  be a family of polynomials of degree  $t - 1$  with  $t \in \mathbb{N}$  and  $r_t$  the associated residuals. Assume the residuals satisfy*

$$|r_t(\sigma)| \leq 1 \quad \forall \sigma \in [0, 1], t \in \mathbb{N} \quad (13)$$

*then it holds that*

$$|g_t(\sigma)| \leq 2t^2 \quad \forall \sigma \in [0, 1].$$

*Proof.*

Using the definition of the residual and the Mean Value Theorem there exist  $\bar{\sigma} \in [0, \sigma]$  such that

$$g_t(\sigma) = \frac{1 - r_t(\sigma)}{\sigma} = \frac{r_t(0) - r_t(\sigma)}{\sigma} = -r'_t(\bar{\sigma}).$$

where  $r'_t$  denotes the first derivative of  $r_t$ .

Markov's inequality for polynomials implies that

$$\sup_{\sigma \in [0, 1]} |r'_t(\sigma)| \leq 2t^2 \sup_{\sigma \in [0, 1]} |r_t(\sigma)|,$$

hence it holds

$$g_t(\sigma) \leq \sup_{\bar{\sigma} \in [0, 1]} |r'_t(\bar{\sigma})| \leq 2t^2.$$

$\square$

Fixed  $\nu > 0$  the residual polynomials  $\{r_t\}_t$  associated to the  $\nu$ -method form a sequence of orthogonal polynomials with respect to the weight function

$$\omega_\nu(\sigma) = \frac{\sigma^{2\nu}}{\sigma^{\frac{1}{2}}(1 - \sigma)^{\frac{1}{2}}},$$

which is a shifted Jacobi weight, hence the residual polynomials  $\{r_t\}_t$  are normalized shifted copies of Jacobi polynomials, where the normalization is due to the constraint  $r_t(0) = 1$ .

Thanks to the properties of orthogonal polynomials, they satisfy Christoffel-Darboux recurrence formula (see e.g. [30])

$$r_{t+1} = r_t(\sigma) + \beta_{t+1} (r_t(\sigma) - r_{t-1}(\sigma)) - \alpha_{t+1} \sigma r_t(\sigma), \quad t \geq 1$$

and a straightforward computation shows that this recursion on our problem carries over to the iterates  $\hat{w}_t$  of the associated method

$$\hat{w}_{t+1} = \hat{w}_t - \alpha_{t+1} X^* (X \hat{w}_t - \mathbf{y}) + \beta_{t+1} (\hat{w}_t - \hat{w}_{t-1}).$$

where, for every  $t > 1$ , the parameters  $\alpha_t, \beta_t$  are defined by

$$\alpha_t = 4 \frac{(2t + 2\nu - 1)(t + \nu - 1)}{(t + 2\nu - 1)(2t + 4\nu - 1)}$$

$$\beta_t = \frac{(t - 1)(2t - 3)(2t + 2\nu - 1)}{(t + 2\nu - 1)(2t + 4\nu - 1)(2t + 2\nu - 3)},$$

with initialization  $\hat{w}_{-1} = \hat{w}_0 = 0$ ,  $\alpha_1 = \frac{4\nu+2}{4\nu+1}$ ,  $\beta_1 = 0$ .

In particular it holds the following result from [11].

**Theorem 3.**

*The residual polynomials  $\{r_t\}_t$  of the  $\nu$ -method ( $\nu$  fixed) are uniformly bounded for all  $t \in \mathbb{N}$ ,*

$$|r_t(\sigma)| \leq 1 \quad \sigma \in [0, 1];$$

*they further satisfy*

$$|\sigma^\nu r_t(\sigma)| \leq c_\nu t^{-2\nu} \quad \forall \sigma \in [0, 1] \quad (14)$$

*with appropriate constants  $0 < c_\nu < +\infty$ .*

**Proof of Proposition 2**

*Proof.*

Theorem 3 states that (10) holds true with  $F_0 = 1$  and that the qualification of the method is  $\nu$ . Moreover by the Lemma 1 we get that also that (9) holds with  $E = 1$ . □

### 7.3 Regularization properties for Nesterov's acceleration

Nesterov iterates (7) can be written as

$$\begin{aligned} \hat{w}_{t+1} &= \hat{w}_t + \beta_t (\hat{w}_t - \hat{w}_{t-1}) - \alpha X^* (X (\hat{w}_t + \beta_t (\hat{w}_t - \hat{w}_{t-1})) - \mathbf{y}) = \\ &= [(\beta_t + 1) (\mathbf{I} - \alpha \hat{\Sigma})] \hat{w}_t + [-\beta_t (\mathbf{I} - \alpha \hat{\Sigma})] \hat{w}_{t-1} + \alpha X^* \mathbf{y} \end{aligned}$$

and since  $\hat{w}_t = g_t(\hat{\Sigma}) X^* \mathbf{y}$  it can be easily proved that the polynomials  $g_t$  and the residual  $r_t$  satisfy the following recursions

$$g_{t+1}(\sigma) = (1 - \alpha\sigma) [g_t(\sigma) + \beta_t (g_t(\sigma) - g_{t-1}(\sigma))] + \alpha \quad (15)$$

$$r_{t+1}(\sigma) = (1 - \alpha\sigma) [r_t(\sigma) + \beta_t (r_t(\sigma) - r_{t-1}(\sigma))] \quad (16)$$

for every  $t \in \mathbb{N}$  with initialization  $g_{-1} = g_0 = 0$  and  $r_{-1} = r_0 = 1$ .

Moreover, we can rewrite (16) as

$$r_{t+1}(\sigma) = (1 - \alpha\sigma) \left[ (1 - \theta_t) r_t(\sigma) + \theta_t \left( r_{t-1}(\sigma) + \frac{1}{\theta_{t-1}} (r_t(\sigma) - r_{t-1}(\sigma)) \right) \right] \quad (17)$$

where for every  $t \in \mathbb{N}$   $\theta_t$  is defined such that

$$\beta_t = \frac{\theta_t}{\theta_{t-1}} (1 - \theta_{t-1}),$$

in particular, the choice (8) implies

$$\theta_t = \frac{\beta}{t + \beta}. \quad (18)$$

With these choices we can state a first proposition about the properties of the residual polynomials of the Nesterov's accelerated method.

**Proposition 4.**

Let  $r_t$  satisfy the recursion (17) where the step-size  $\alpha$  is chosen such that  $\alpha\kappa^2 < 1$  and  $\theta_t$  defined in (18), then for all  $r \in [0, 1/2]$

$$\sigma^r |r_t(\sigma)| \leq \left(\frac{\beta^2}{\alpha}\right)^r t^{-2r} \quad (19)$$

for all  $\sigma \in [0, \kappa^2]$ .

*Proof.*

Let  $\sigma \in [0, \kappa^2]$ , following [23] we can see the right hand of (17) as a convex combination between  $r_t$  and

$$R_t(\sigma) = r_{t-1}(\sigma) + \frac{1}{\theta_{t-1}}(r_t(\sigma) - r_{t-1}(\sigma)) .$$

We can observe that polynomials  $r_t$  and  $R_t$  satisfy the following recursions

$$r_{t+1}(\sigma) = (1 - \alpha\sigma)(1 - \theta_t)r_t(\sigma) + \theta_t(1 - \alpha\sigma)R_t(\sigma)$$

$$R_{t+1}(\sigma) = -\frac{\alpha\sigma}{\theta_t}(1 - \theta_t)r_t(\sigma) + (1 - \alpha\sigma)R_t(\sigma)$$

By computing the square of the polynomials and rescaling them in order to get the two mixed term to be opposite, we obtain that

$$\frac{\alpha\sigma}{\theta_t^2}r_{t+1}^2(\sigma) + (1 - \alpha\sigma)R_{t+1}^2 = (1 - \alpha\sigma) \left[ \frac{(1 - \theta_t)^2\alpha\sigma}{\theta_t^2}r_t^2(\sigma) + (1 - \alpha\sigma)R_t^2(\sigma) \right]$$

We can observe that parameters  $\theta_t$  satisfy the following

$$1 \geq \theta_t \geq \frac{\theta_{t-1}}{1 + \theta_{t-1}}$$

which implies

$$\frac{(1 - \theta_t^2)}{\theta_t^2} \leq \frac{1}{\theta_{t-1}^2} .$$

Hence we get that

$$\begin{aligned} \frac{\alpha\sigma}{\theta_t^2}r_{t+1}^2(\sigma) + (1 - \alpha\sigma)R_{t+1}^2 &\leq (1 - \alpha\sigma) \left[ \frac{\alpha\sigma}{\theta_{t-1}^2}r_t^2(\sigma) + (1 - \alpha\sigma)R_t^2(\sigma) \right] \\ &\leq (1 - \alpha\sigma)^t \left[ \frac{\alpha\sigma}{\theta_0^2}r_1^2(\sigma) + (1 - \alpha\sigma)R_1^2(\sigma) \right] \end{aligned}$$

where the second inequality follows by induction.

Finally, using that  $\theta_0 = 1$  and  $R_0 = 1$ , yields that

$$\frac{\alpha\sigma}{\theta_{t-1}^2}r_t^2(\sigma) + (1 - \alpha\sigma)R_t^2 \leq (1 - \alpha\sigma)^{t+1} .$$

This inequality implies that both the terms in the sum are smaller than  $(1 - \alpha\sigma)^{t+1}$ , hence

$$|R_t(\sigma)| \leq 1 \quad (20)$$

$$\sigma r_t^2(\sigma) \leq \frac{\theta_{t-1}^2}{\alpha}(1 - \alpha\sigma)^{t+1} \quad (21)$$

By induction it follows from (20) that (19) holds for  $r = 0$ :

$$|r_t(\sigma)| \leq 1$$

because  $r_{t+1}$  is a convex combination of  $r_t$  and  $R_t$  multiplied by  $(1 - \alpha\sigma)$ .

While (21) implies (19) for  $r = 1/2$ . The remaining cases  $r \in (0, 1/2)$  follow by interpolation.  $\square$

By a scaled version of Lemma 1 it holds that

$$|g_t(\sigma)| \leq 2\alpha t^2 \quad \forall \sigma \in [0, \kappa^2] .$$

*Proof of Proposition 3*

*Proof.* The proof follows immediately by the above results.  $\square$

## 8 Appendix: generalization bound via spectral/regularized algorithm

### 8.1 Learning with kernels

The setting in this paper recover non-parametric regression over a RKHS as a special case. Let  $\Xi \times \mathbb{R}$  be a probability space with distribution  $\mu$ , the goal is to minimize the risk

$$\mathcal{E}(f) = \int_{\Xi \times \mathbb{R}} (y - f(\xi))^2 d\mu(\xi, y).$$

A common way to build an estimator is to consider a symmetric kernel  $K : \Xi \times \Xi \rightarrow \mathbb{R}$  which is positive definite, which means that for every  $m \in \mathbb{N}$  and  $\xi_1, \dots, \xi_m \in \Xi$  the matrix with the entries  $K(\xi_i, \xi_j)$  for  $i, j = 1, \dots, m$ . This kernel defines a unique Hilbert space of function  $\mathcal{H}_K$  with the inner product  $\langle \cdot, \cdot \rangle_K$  and such that for all  $\xi \in \Xi$ ,  $K_\xi(\cdot) = K(\xi, \cdot) \in \mathcal{H}_K$  and the following reproducing property holds for all  $f \in \mathcal{H}_K$ ,  $f(\xi) = \langle f, K_\xi \rangle_K$ . By introducing the feature map  $\Psi : \Xi \rightarrow \mathcal{H}_K$  defined by  $\Psi(\xi) = K_\xi$ , and we further consider  $\bar{\Psi} : \Xi \times \mathbb{R} \rightarrow \mathcal{H}_K \times \mathbb{R}$ , where  $\bar{\Psi}(\xi, y) = (K_\xi, y)$ , which provide  $\mathcal{H}_K \times \mathbb{R}$  the probability distribution  $\mu_{\bar{\Psi}}$ . Denoting  $\mathcal{X} = \mathcal{H}_K$  and  $\rho = \mu_{\bar{\Psi}}$  we come back to our previous setting, in fact by the change of variable  $(K_\xi, y) = (x, y)$  we have

$$\int_{\Xi \times \mathbb{R}} (y - f(\xi))^2 d\mu(\xi, y) = \int_{\Xi \times \mathbb{R}} (y - \langle f, K_\xi \rangle_K)^2 d\mu(\xi, y) = \int_{\mathcal{X} \times \mathbb{R}} (y - \langle f, x \rangle_K)^2 d\rho(x, y).$$

### 8.2 Mathematical setting

Let's consider the hypothesis space

$$\mathcal{H} = \left\{ f : \mathcal{X} \rightarrow \mathbb{R} \mid \exists w \in \mathcal{X} \text{ with } f(x) = \langle w, x \rangle \text{ } \rho_{\mathcal{X}}\text{-almost surely} \right\},$$

which under assumption 1 is a subspace of the Hilbert space of the square integral functions from  $\mathcal{X}$  to  $\mathbb{R}$  with respect to the measure  $\rho_{\mathcal{X}}$

$$L_{\rho_{\mathcal{X}}}^2 = \left\{ f : \mathcal{X} \rightarrow \mathbb{R} \mid \|f\|_{\rho_{\mathcal{X}}}^2 = \langle f, f \rangle_{\rho_{\mathcal{X}}} := \int_{\mathcal{X}} f(x)^2 d\rho_{\mathcal{X}}(x) < +\infty \right\}.$$

The function that minimizes the expected risk over all possible measurable functions is the regression function [28].

$$f_{\rho} = \arg \min_{f : \mathcal{X} \rightarrow \mathbb{R}} \mathcal{E}(f), \quad \mathcal{E}(f) = \int_{\mathcal{X} \times \mathbb{R}} (f(x) - y)^2 d\rho(x, y)$$

$$f_{\rho}(x) = \int_{\mathbb{R}} y d\rho(y|x) \quad \forall x \in \mathcal{X}, \text{ } \rho_{\mathcal{X}}\text{-almost surely.}$$

which under assumption 1 the regression function  $f_{\rho}$  belongs to  $L_{\rho_{\mathcal{X}}}^2$ .

Assuming (1) implies that a solution  $f_{\mathcal{H}}$  for the problem

$$\inf_{\mathcal{H}} \mathcal{E},$$

which is equivalent to 2, is the projection of the regression function  $f_{\rho}$  into the closure of  $\mathcal{H}$  in  $L_{\rho_{\mathcal{X}}}^2$ .

In fact a standard result (see e.g. [28]) show that for all  $f$  in  $L_{\rho_{\mathcal{X}}}^2$

$$\mathcal{E}(f) = \|f - f_{\rho}\|_{\rho_{\mathcal{X}}}^2 + \mathcal{E}(f_{\rho}). \quad (22)$$

We now introduce some useful operators. Let  $S : \mathcal{X} \rightarrow L_{\rho_{\mathcal{X}}}^2$  be the linear map defined by  $Sw = \langle w, \cdot \rangle$  which is bounded by  $k$  for (1), in fact for the Cauchy–Schwarz inequality

$$\|Sw\|_{\rho_{\mathcal{X}}}^2 = \int_{\mathcal{X}} \langle w, x \rangle^2 d\rho_{\mathcal{X}}(x) \leq \kappa^2 \|w\|^2.$$

Furthermore, we consider the the adjoint operator  $S^* : L_{\rho_{\mathcal{X}}}^2 \rightarrow \mathcal{X}$  (i.e. the operator which satisfy  $\langle Sw, f \rangle_{\rho_{\mathcal{X}}} = \langle w, S^*f \rangle$ ), the covariance operator  $\Sigma : \mathcal{X} \rightarrow \mathcal{X}$  given by  $\Sigma = S^*S$  and the operator  $L : L_{\rho_{\mathcal{X}}}^2 \rightarrow L_{\rho_{\mathcal{X}}}^2$  defined by  $L = SS^*$ . It's easy to observe that these operators are defined as follows

$$S^*f = \int_{\mathcal{X}} xf(x) d\rho_{\mathcal{X}}(x), \quad \Sigma w = \int_{\mathcal{X}} \langle w, x \rangle x d\rho_{\mathcal{X}}(x), \quad Lf = \int_{\mathcal{X}} f(x) \langle x, \cdot \rangle d\rho_{\mathcal{X}}(x)$$



and that the operators  $\Sigma$  and  $L$  are linear positive-definite trace class operators bounded by  $\kappa^2$ . Moreover, for any  $w \in \mathcal{X}$  it holds the following isometry property [28]

$$\|Sw\|_{\rho_{\mathcal{X}}} = \|\sqrt{\Sigma}w\|.$$

Similarly we define the sampling operator  $X : \mathcal{X} \rightarrow \mathbb{R}^n$  by  $(Xw)_i = \langle w, x_i \rangle$  for  $i = 1 \dots, n$  where the norm  $\|\cdot\|_n$  in  $\mathbb{R}^n$  is the Euclidean norm multiplied by  $1/\sqrt{n}$ , it's adjoint operator  $X^* : \mathbb{R}^n \rightarrow \mathcal{X}$  and the empirical covariance operator  $\hat{\Sigma} = X^* X$ , that are defined as

$$X^* y = \frac{1}{n} \sum_{i=1}^n x_i y_i, \quad \hat{\Sigma} w = \frac{1}{n} \sum_{i=1}^n \langle w, x_i \rangle x_i.$$

Similarly to the previous case  $X$  and  $\hat{\Sigma}$  are bounded by  $\kappa$  and  $\kappa^2$  respectively.

From (22) it's easy to see that problem (2) can be rewritten as

$$\inf_{w \in \mathcal{X}} \|Sw - f_{\rho}\|_{\rho_{\mathcal{X}}}^2.$$

Moreover, for the projection theorem it holds true that

$$S^* f_{\rho} = S^* f_{\mathcal{H}},$$

which implies that problem 2 can be rewritten as

$$\inf_{w \in \mathcal{X}} \|Sw - f_{\mathcal{H}}\|_{\rho_{\mathcal{X}}}^2. \quad (23)$$

A regularization approach applied to the empirical risk minimization problem

$$\inf_{w \in \mathcal{X}} \|Xw - \mathbf{y}\|_n^2. \quad (24)$$

leads to an estimated solution of the form

$$\hat{w}_{\lambda} = g_{\lambda}(\hat{\Sigma}) X^* \mathbf{y}, \quad (25)$$

where  $g_{\lambda}$  is a regularization function satisfying Definition 1 with qualification  $q$  (Definition 2).

Differently from the inverse problem setting we are trying to approximate a solution to the ideal problem (23) with a solution of the empirical problem (24) where  $X$ ,  $\mathbf{y}$  are not only approximation of the ideal version  $S$ ,  $f_{\mathcal{H}}$  but are defined in different space.

Using the same regularization approach to the ideal problem we can define the unknown regularized solution as

$$w_{\lambda} = g_{\lambda}(\Sigma) S^* f_{\mathcal{H}}. \quad (26)$$

The performance of regularization algorithms  $\hat{w}_{\lambda}$  can be measured in terms of the excess risk  $\|S\hat{w}_{\lambda} - f_{\mathcal{H}}\|_{\rho_{\mathcal{X}}}^2$ . Assuming that  $f_{\mathcal{H}} \in \mathcal{H}$ , which implies that there exists some  $w^*$  such that  $f_{\mathcal{H}} = Sw^*$ , it can be measured in terms of  $\mathcal{X}$ -norm  $\|\hat{w}_{\lambda} - w^*\|$  which is closely related to  $\|L^{-1/2} S(\hat{w}_{\lambda} - w^*)\|_{\rho_{\mathcal{X}}} = \|L^{-1/2} (S\hat{w}_{\lambda} - f_{\mathcal{H}})\|_{\rho_{\mathcal{X}}}$  since for all  $w \in \mathcal{X}$

$$\|L^{-1/2} Sw\|_{\rho_{\mathcal{X}}} \leq \|w\|.$$

In what follows, we will measure the performance of algorithms in terms of a broader class of norms,  $\|L^{-a} (S\hat{w}_{\lambda} - f_{\mathcal{H}})\|_{\rho_{\mathcal{X}}}$ , where  $a \in [0, 1/2]$  is such that  $L^{-a} f_{\mathcal{H}}$  is well defined.

Differently from the Assumption 4 here we consider a more general assumption on the target function and we don't assume any condition on the effective dimension  $\mathcal{N}(\lambda)$ .

#### Assumption 5.

There exist  $g_0 \in L_{\rho_{\mathcal{X}}}^2$  such that

$$f_{\mathcal{H}} = \Phi(L)g_0, \quad \text{with } \|g_0\|_{\rho_{\mathcal{X}}} \leq R,$$

where  $\Phi : [0, \kappa^2] \rightarrow [0, +\infty)$  is a non-decreasing, operator monotone index function such that  $\Phi(0) = 0$  and  $\Phi(\kappa^2) < +\infty$ . Moreover, for some  $\zeta \in [0, q]$ , the function  $\Phi(u)u^{-\zeta}$  is non-decreasing, and the qualification  $q$  of  $g_{\lambda}$  covers the index function  $\Phi$ , which means that there exist a constant  $c > 0$  such that for all  $0 < \lambda < \kappa^2$ ,

$$c \frac{\lambda^q}{\Phi(\lambda)} \leq \inf_{\lambda \leq u \leq \kappa^2} \frac{u^q}{\Phi(u)}.$$

We are ready to state our general result.

**Theorem 4.**

Under Assumption 2, 3, 5, let  $\hat{w}_\lambda$  defined in (25),  $a \in [0, 1/2]$ ,  $\delta \in (0, 1/2)$  and  $\lambda \in (0, 1)$ . Assume the qualification  $q$  of the chosen method to be larger than 1 and the sample-size  $n$  satisfy the following condition

$$n \geq \frac{32\kappa^2\beta}{4\lambda}, \quad \beta = \log \frac{4\kappa^2(\mathcal{N}(\lambda) + 1)}{\delta \|\Sigma\|},$$

then with probability at least  $1 - \delta$  it holds true that

$$\|L^{-a}(S\hat{w}_\lambda - f_{\mathcal{H}})\|_{\rho_x} \leq \lambda^{-a} \left( \frac{\tilde{C}_1}{n\lambda^{\frac{1}{2}\vee(1-\zeta)}} + \left( \tilde{C}_2 + \frac{\tilde{C}_3}{\sqrt{n\lambda}} \right) \Phi(\lambda) + \tilde{C}_4 \sqrt{\frac{\mathcal{N}(\lambda)}{n}} \right) \log^2 \frac{2}{\delta}$$

where the constants  $\tilde{C}_1, \tilde{C}_2, \tilde{C}_3, \tilde{C}_4$  does not depend on  $n, \lambda, \delta$ .

In the follow we denote with  $C$  a positive constant which does not depend on  $n, \delta, \lambda$  and can be different every times it appears.

In particular, assuming  $\lambda = O(n^{-\theta})$ , and  $n$  to be large enough, then with probability at least  $1 - \delta$

$$\|L^{-a}(S\hat{w}_\lambda - f_{\mathcal{H}})\|_{\rho_x}^2 \leq C\lambda^{-2a} \left( \Phi(\lambda)^2 + \frac{\mathcal{N}(\lambda)}{n} \right) \log^2 \frac{2}{\delta}. \quad (27)$$

Moreover assuming Holder source condition  $\Phi(u) = u^r$  and that there exist  $\gamma \geq 1, c_\gamma > 0$  such that  $\mathcal{N}(\lambda) \leq c_\gamma \lambda^{-\frac{1}{\gamma}}$  then with probability at least  $1 - \delta$  inequality 27 can be rewritten as

$$\|L^{-a}(S\hat{w}_\lambda - f_{\mathcal{H}})\|_{\rho_x}^2 \leq C\lambda^{-2a} \left( \lambda^{2r} + \frac{\lambda^{-\frac{1}{\gamma}}}{n} \right) \log^2 \frac{2}{\delta}, \quad (28)$$

where if we choose  $a = 0, \lambda = O(n^{-\frac{\gamma}{2\gamma r + 1}})$  we obtain the convergence result

$$\|S\hat{w}_\lambda - f_{\mathcal{H}}\|_{\rho_x}^2 \leq C \left( n^{\frac{-2r\gamma}{2r\gamma + 1}} \right) \log^2 \frac{2}{\delta}. \quad (29)$$

### 8.3 Lemmas for Theorem 4

We firstly observe that Definition 1 and 2 of regularization function with qualification  $q$  are equivalent to the following:

$$\begin{aligned} \sup_{\alpha \in [0, 1]} \sup_{\lambda \in (0, 1]} \sup_{u \in (0, \kappa^2]} |u^\alpha g_\lambda(u)| &\leq E' \lambda^{1-\alpha} \\ \sup_{\alpha \in [0, q]} \sup_{\lambda \in (0, 1]} \sup_{u \in (0, \kappa^2]} |r_\lambda(u) u^\alpha \lambda^{-\alpha}| &\leq F'_q. \end{aligned} \quad (30)$$

where  $E' = \max(E, F_0 + 1)$  and  $F'_q = \max(F_0, F_q)$ .

In this section we give some lemmas which are at the base of the proof of the learning bound.

#### Deterministic estimates

The deterministic estimates concern the convergence term in the error bound

$$Sw_\lambda - f_{\mathcal{H}} = Sg_\lambda(\Sigma)S^*f_{\mathcal{H}} - f_{\mathcal{H}} = (g_\lambda(L)L - I)f_{\mathcal{H}} = -r_\lambda(L)f_{\mathcal{H}}$$

and it holds true the following lemma from [19].

**Lemma 2.**

Under Assumption 4, let  $w_\lambda$  given by (26), we have for all  $a \in [0, \zeta]$ ,

$$\|L^{-a}(Sw_\lambda - f_{\mathcal{H}})\|_\rho \leq c_g R \Phi(\lambda) \lambda^{-a}, \quad c_g = \frac{F'_q}{c \wedge 1},$$

and

$$\|w_\lambda\| \leq E' \Phi(\kappa^2) \kappa^{-(2\zeta \wedge 1)} \lambda^{-(\frac{1}{2} - \zeta)_+}.$$

#### Probabilistic estimates

Next lemma concern the concentration of the empirical mean of random variable in a Hilbert space.

**Lemma 3.**

Let  $w_1, \dots, w_m$  be i.i.d. random variables in a Hilbert space with norm  $\|\cdot\|$  and assume there exist two positive constants  $B$  and  $\sigma^2$  such that

$$\mathbb{E} \left[ \|w_1 - \mathbb{E}[w_1]\|^l \right] \leq \frac{1}{2} l! B^{l-2} \sigma^2, \quad \forall l \geq 2.$$

Then for any  $0 < \delta < 1/2$ , the following holds with probability at least  $1 - \delta$ ,

$$\left\| \frac{1}{m} \sum_{i=1}^m w_i - \mathbb{E}[w_i] \right\| \leq 2 \left( \frac{B}{m} + \frac{\sigma}{\sqrt{m}} \right) \log \frac{2}{\delta}.$$

In the following two lemmas we control in probability the approximation of the covariance operator  $\Sigma$  with the empirical covariance  $\hat{\Sigma}$ .

**Lemma 4.**

Let  $0 < \delta < 1/2$ , it holds with probability at least  $1 - \delta$ :

$$\left\| \Sigma - \hat{\Sigma} \right\|_{op} \leq \left\| \Sigma - \hat{\Sigma} \right\|_{HS} \leq \frac{6\kappa^2}{\sqrt{n}} \log \frac{2}{\delta},$$

where  $\|\cdot\|_{HS}$  denotes the Hilbert-Schmidt norm.

This lemma is a consequence of the lemma above, (see e.g. [3] for a proof).

**Lemma 5.**

Let  $\delta \in (0, 1)$  and  $\lambda > 0$ . With probability at least  $1 - \delta$  the following holds:

$$\left\| \Sigma_\lambda^{-1/2} (\Sigma - \hat{\Sigma}) \hat{\Sigma}_\lambda^{-1/2} \right\|_{op} \leq \frac{4\kappa^2 \beta}{3n\lambda} + \sqrt{\frac{2\kappa^2 \beta}{n\lambda}}, \quad \beta = \log \frac{4\kappa^2 (\mathcal{N}(\lambda) + 1)}{\delta \|\Sigma\|_{op}}$$

where we denote  $\Sigma_\lambda := \Sigma + \lambda I$  and  $\hat{\Sigma}_\lambda := \hat{\Sigma} + \lambda I$ .

A proof of this result can be found in [17].

**Lemma 6.**

Let  $c, \delta \in (0, 1)$  and  $\lambda > 0$ . Assume

$$n \geq \frac{32\kappa^2 \beta}{(\sqrt{9 + 24c} - 3)^2 \lambda}, \quad \beta = \log \frac{4\kappa^2 (\mathcal{N}(\lambda) + 1)}{\delta \|\Sigma\|_{op}}$$

then it holds with probability at least  $1 - \delta$

$$\begin{aligned} \left\| \Sigma_\lambda^{-1/2} \hat{\Sigma}_\lambda^{1/2} \right\|_{op}^2 &\leq 1 + c \\ \left\| \Sigma_\lambda^{1/2} \hat{\Sigma}_\lambda^{-1/2} \right\|_{op}^2 &\leq (1 - c)^{-1} \end{aligned}$$

In particular we will choose  $c = 2/3$ .

*Proof.*

The condition

$$\frac{4\kappa^2 \beta}{3n\lambda} + \sqrt{\frac{2\kappa^2 \beta}{n\lambda}} \leq c$$

can be seen as a second degree inequality, and it's equivalent to the assumption

$$n \geq \frac{32\kappa^2 \beta}{(\sqrt{9 + 24c} - 3)^2 \lambda}, \quad \beta = \log \frac{4\kappa^2 (\mathcal{N}(\lambda) + 1)}{\delta \|\Sigma\|_{op}}.$$

Applying Lemma 5 it holds true that

$$\left\| \Sigma_\lambda^{-1/2} (\Sigma - \hat{\Sigma}) \hat{\Sigma}_\lambda^{-1/2} \right\|_{op} \leq c.$$

Now, we can prove that

$$\begin{aligned}\left\|\Sigma_\lambda^{-1/2}\hat{\Sigma}_\lambda^{1/2}\right\|_{op}^2 &= \left\|\Sigma_\lambda^{-1/2}\hat{\Sigma}_\lambda\hat{\Sigma}_\lambda^{-1/2}\right\|_{op} = \left\|\Sigma_\lambda^{-1/2}\left(\Sigma - \hat{\Sigma}\right)\hat{\Sigma}_\lambda^{-1/2} + \mathbf{I}\right\|_{op} \\ &\leq \left\|\Sigma_\lambda^{-1/2}\left(\Sigma - \hat{\Sigma}\right)\hat{\Sigma}_\lambda^{-1/2}\right\|_{op} + \|\mathbf{I}\|_{op} \leq c + 1\end{aligned}$$

which proves the first part of the thesis.

From [7] we get

$$\left\|\Sigma_\lambda^{1/2}\hat{\Sigma}_\lambda^{-1/2}\right\|_{op}^2 = \left\|\Sigma_\lambda^{1/2}\hat{\Sigma}_\lambda^{-1}\Sigma_\lambda^{1/2}\right\|_{op} = \left\|\left(\mathbf{I} - \Sigma_\lambda^{-1/2}\left(\Sigma - \hat{\Sigma}\right)\hat{\Sigma}_\lambda^{-1/2}\right)^{-1}\right\|_{op} \leq (1 - c)^{-1}$$

which completes the proof.  $\square$

The last important lemma regards the concentration of the empirical quantities  $\hat{\Sigma}w_\lambda, X^* \mathbf{y}$  around the ideal ones  $\Sigma w_\lambda, S^* f_{\mathcal{H}}$ .

**Lemma 7.**

Under Assumptions 2, 3, 4, let  $\delta \in (0, 1/2)$  and  $w_\lambda$  given by (26), then the following holds with probability at least  $1 - \delta$ :

$$\left\|\Sigma_\lambda^{-1/2}\left[\left(\hat{\Sigma}w_\lambda - X^* \mathbf{y}\right) - \left(\Sigma w_\lambda - S^* f_{\mathcal{H}}\right)\right]\right\| \leq \left(\frac{C_1}{n\lambda^{\frac{1}{2}\vee(1-\zeta)}} + \sqrt{\frac{C_2\Phi(\lambda)^2}{n\lambda} + \frac{C_3\mathcal{N}(\lambda)}{n}}\right) \log \frac{2}{\delta}$$

where

$$\begin{aligned}C_1 &= 8\left(\kappa M + \kappa^2 E' \Phi(\kappa^2) \kappa^{-(2\zeta \wedge 1)}\right) \\ C_2 &= 96c_g^2 R^2 \kappa^2 \\ C_3 &= 32(3B^2 + 4Q^2) .\end{aligned}$$

*Proof.*

Let  $\xi_i = \Sigma_\lambda^{-1/2}(\langle w, x_i \rangle - y_i)x_i$  for every  $i \in 1, \dots, n$ , for the sake of simplicity we consider the random variable  $\xi = \Sigma_\lambda^{-1/2}(\langle w, x \rangle - y)x$  independent and identically distributed to  $\xi_i$  for every  $i \in \{1, \dots, n\}$ . Now a simple calculation shows that

$$\mathbb{E}[\xi] = \Sigma_\lambda^{-1/2}(\Sigma w_\lambda - S^* f_{\mathcal{H}}) .$$

In order to apply Lemma 3, we bound  $\mathbb{E}\|\xi - \mathbb{E}[\xi]\|^l$  for any  $\mathbb{N} \ni l \geq 2$ , in fact by using Holder inequality we get

$$\mathbb{E}\|\xi - \mathbb{E}[\xi]\|^l \leq \mathbb{E}[\|\xi\| - \mathbb{E}\|\xi\|]^l \leq 2^{l-1} \left(\mathbb{E}\|\xi\|^l + (\mathbb{E}\|\xi\|)^l\right) \leq 2^l \mathbb{E}\|\xi\|^l . \quad (31)$$

We can proceed bounding

$$\begin{aligned}\mathbb{E}\|\xi\|^l &= \mathbb{E}\left[\left\|\Sigma_\lambda^{-1/2}(y - \langle w_\lambda, x \rangle)x\right\|^l\right] \\ &= \mathbb{E}\left[\left\|\Sigma_\lambda^{-1/2}x\right\|^l |y - \langle w_\lambda, x \rangle|^l\right] \\ &\leq 2^{l-1} \mathbb{E}\left[\left\|\Sigma_\lambda^{-1/2}x\right\|^l (|y|^l + |\langle w_\lambda, x \rangle|^l)\right] .\end{aligned}$$

Now, thanks to (1) and Cauchy-Schwarz inequality, it holds that

$$\left\|\Sigma_\lambda^{-1/2}x\right\| \leq \frac{\kappa}{\sqrt{\lambda}} \quad (32)$$

$$|\langle w_\lambda, x \rangle| \leq \|w_\lambda\| \|x\| \leq \kappa \|w_\lambda\| . \quad (33)$$

Thus we get, using again Cauchy-Schwarz inequality

$$\mathbb{E} \|\xi\|^l \leq 2^{l-1} \left( \frac{\kappa}{\sqrt{\lambda}} \right)^{l-2} \mathbb{E} \left[ \left\| \Sigma_\lambda^{-1/2} x \right\|^2 \left( |y|^l + (\kappa \|w_\lambda\|)^{l-2} |\langle w_\lambda, x \rangle|^2 \right) \right]. \quad (34)$$

Regarding the first term of the sum, by Assumption 2,

$$\begin{aligned} \mathbb{E} \left[ \left\| \Sigma_\lambda^{-1/2} x \right\|^2 |y|^l \right] &= \int_{\mathcal{X}} \left\| \Sigma_\lambda^{-1/2} x \right\|^2 \int_{\mathbb{R}} |y|^l d\rho(y|x) d\rho_{\mathcal{X}}(x) \\ &\leq \frac{1}{2} l! M^{l-2} Q^2 \int_{\mathcal{X}} \left\| \Sigma_\lambda^{-1/2} x \right\|^2 d\rho_{\mathcal{X}}(x). \end{aligned}$$

Observing that  $\|w\| = \text{Tr}(w \otimes w)$  it holds that

$$\int_{\mathcal{X}} \left\| \Sigma_\lambda^{-1/2} x \right\|^2 d\rho_{\mathcal{X}}(x) = \int_{\mathcal{X}} \text{Tr} \left( \Sigma_\lambda^{-1/2} x \otimes x \Sigma_\lambda^{-1/2} \right) d\rho_{\mathcal{X}}(x) = \text{Tr} \left( \Sigma_\lambda^{-1/2} \Sigma \Sigma_\lambda^{-1/2} \right) = \mathcal{N}(\lambda), \quad (35)$$

we get

$$\mathbb{E} \left[ \left\| \Sigma_\lambda^{-1/2} x \right\|^2 |y|^l \right] \leq \frac{1}{2} l! M^{l-2} Q^2 \mathcal{N}(\lambda). \quad (36)$$

Besides, Cauchy-Schwarz inequality implies that

$$\mathbb{E} \left[ \left\| \Sigma_\lambda^{-1/2} x \right\|^2 |\langle w_\lambda, x \rangle|^2 \right] \leq 3 \mathbb{E} \left[ \left\| \Sigma_\lambda^{-1/2} x \right\|^2 (|\langle w_\lambda, x \rangle - f_{\mathcal{H}}(x)|^2 + |f_{\mathcal{H}}(x) - f_\rho(x)|^2 + |f_\rho(x)|^2) \right].$$

For the first term, Lemma 2 and inequality (32) implies that

$$\begin{aligned} \mathbb{E} \left[ \left\| \Sigma_\lambda^{-1/2} x \right\|^2 |\langle w_\lambda, x \rangle - f_{\mathcal{H}}(x)|^2 \right] &\leq \frac{\kappa^2}{\lambda} \mathbb{E} [|\langle w_\lambda, x \rangle - f_{\mathcal{H}}(x)|^2] \\ &= \frac{\kappa^2}{\lambda} \|S w_\lambda - f_{\mathcal{H}}\|_\rho^2 \\ &\leq c_g^2 R^2 \kappa^2 \frac{\Phi(\lambda)^2}{\lambda}. \end{aligned}$$

The second term can be controlled using Assumption 3,

$$\begin{aligned} \mathbb{E} \left[ \left\| \Sigma_\lambda^{-1/2} x \right\|^2 |f_{\mathcal{H}}(x) - f_\rho(x)|^2 \right] &= \mathbb{E} \left[ \text{Tr} \left( \Sigma_\lambda^{-1/2} x \otimes x \Sigma_\lambda^{-1/2} \right) (f_{\mathcal{H}}(x) - f_\rho(x))^2 \right] \\ &= \mathbb{E} \left[ \text{Tr} \left( \Sigma_\lambda^{-1} (f_{\mathcal{H}}(x) - f_\rho(x))^2 x \otimes x \right) \right] \\ &= \text{Tr} \left( \Sigma_\lambda^{-1} \mathbb{E} [(f_{\mathcal{H}}(x) - f_\rho(x))^2 x \otimes x] \right) \\ &\leq B^2 \text{Tr} (\Sigma_\lambda^{-1} \Sigma) = B^2 \mathcal{N}(\lambda). \end{aligned}$$

For the last term, by (12) and (35) we obtain

$$\mathbb{E} \left[ \left\| \Sigma_\lambda^{-1/2} x \right\|^2 |f_\rho(x)|^2 \right] \leq Q^2 \mathbb{E} \left[ \left\| \Sigma_\lambda^{-1/2} x \right\|^2 \right] = Q^2 \mathcal{N}(\lambda).$$

Therefore we obtain

$$\mathbb{E} \left[ \left\| \Sigma_\lambda^{-1/2} x \right\|^2 |\langle w_\lambda, x \rangle|^2 \right] \leq 3 \left( c_g^2 R^2 \kappa^2 \frac{\Phi(\lambda)^2}{\lambda} + (B^2 + Q^2) \mathcal{N}(\lambda) \right).$$

Now, putting this together with (36) in (34) we get

$$\begin{aligned} \mathbb{E} \|\xi\|^l &\leq 2^{l-1} \left( \frac{\kappa}{\sqrt{\lambda}} \right)^{l-2} \left[ \frac{1}{2} l! M^{l-2} Q^2 \mathcal{N}(\lambda) + 3 (\kappa \|w_\lambda\|)^{l-2} \left( c_g^2 R^2 \kappa^2 \frac{\Phi(\lambda)^2}{\lambda} + (B^2 + Q^2) \mathcal{N}(\lambda) \right) \right] \\ &\leq 2^{l-1} \frac{1}{2} l! \left( \frac{\kappa M + \kappa^2 \|w_\lambda\|}{\sqrt{\lambda}} \right)^{l-2} \left( Q^2 \mathcal{N}(\lambda) + 3 \left( c_g^2 R^2 \kappa^2 \frac{\Phi(\lambda)^2}{\lambda} + (B^2 + Q^2) \mathcal{N}(\lambda) \right) \right) \\ &\leq 2^{l-1} \frac{1}{2} l! \left( \frac{\kappa M + \kappa^2 \|w_\lambda\|}{\sqrt{\lambda}} \right)^{l-2} \left( 3 c_g^2 R^2 \kappa^2 \frac{\Phi(\lambda)^2}{\lambda} + (3B^2 + 4Q^2) \mathcal{N}(\lambda) \right). \end{aligned}$$

Now by inequality (31) and Lemma 2 we obtain

$$\mathbb{E} \|\xi - \mathbb{E}[\xi]\|^l \leq \frac{1}{2} l! \left( \frac{4(\kappa M + \kappa^2 E' \Phi(\kappa^2) \kappa^{-(2\zeta \wedge 1)})}{\lambda^{\frac{1}{2} \vee (1-\zeta)}} \right)^{l-2} 8 \left( 3c_g^2 R^2 \kappa^2 \frac{\Phi(\lambda)^2}{\lambda} + (3B^2 + 4Q^2) \mathcal{N}(\lambda) \right).$$

The proof follows by applying Lemma 3.  $\square$

### Operator inequalities

**Lemma 8** ([12], Cordes inequalities).

Let  $A, B$  be two positive bounded linear operators on a separable Hilbert space, then for all  $s \in [0, 1]$

$$\|A^s B^s\|_{op} \leq \|AB\|_{op}^s.$$

**Lemma 9** ([20, 21]).

Let  $\psi$  be an operator monotone index function on  $[0, b]$ , with  $b > 1$ . Then there is a constant  $c_\psi < +\infty$  depending on  $b - a$ , such that for any pair  $B_1, B_2$  such that  $\|B_1\|_{op}, \|B_2\|_{op} \leq a$ , of non-negative self-adjoint operators on some Hilbert space, it holds,

$$\|\psi(B_1) - \psi(B_2)\| \leq c_\psi \psi\left(\|B_1 - B_2\|_{op}\right).$$

Moreover, there is  $c'_\psi > 0$  such that

$$c'_\psi \frac{\lambda}{\psi(\lambda)} \leq \frac{u}{\psi(u)}$$

whenever  $0 < \lambda < u \leq a \leq b$ .

### 8.4 Proof of Theorem 4

*Proof.*

It is a standard approach to decompose the error in the following way

$$\begin{aligned} \|L^{-a}(S\hat{w}_\lambda - f_{\mathcal{H}})\|_{\rho_{\mathcal{X}}} &= \|L^{-a}[S(\hat{w}_\lambda - w_\lambda) + (Sw_\lambda - f_{\mathcal{H}})]\|_{\rho_{\mathcal{X}}} \\ &\leq \underbrace{\|L^{-a}S(\hat{w}_\lambda - w_\lambda)\|_{\rho_{\mathcal{X}}}}_{\text{stability}} + \underbrace{\|L^{-a}(Sw_\lambda - f_{\mathcal{H}})\|_{\rho_{\mathcal{X}}}}_{\text{convergence}}. \end{aligned} \quad (37)$$

With this error decomposition the first term of the sum depends on how much the empirical and ideal problem are related, while the second term depends on the convergence properties of the regularization method used.

#### Convergence

Lemma 2 implies that the convergence term can be controlled with

$$\|L^{-a}(Sw_\lambda - f_{\mathcal{H}})\|_{\rho_{\mathcal{X}}} \leq c_g R \Phi(\lambda) \lambda^{-a}. \quad (38)$$

#### Stability

Regarding the stability term we first observe that by Lemma 4, 6 (with  $c = 2/3$ ) and 7 and assuming

$$n \geq \frac{32\kappa^2\beta}{4\lambda}, \quad \beta = \log \frac{4\kappa^2(\mathcal{N}(\lambda) + 1)}{\delta \|\Sigma\|}$$

then with probability at least  $1 - \delta$  it holds true that

$$\begin{aligned} \|\Sigma_\lambda^{-1/2} \hat{\Sigma}_\lambda^{1/2}\|_{op}^2 \vee \|\Sigma_\lambda^{1/2} \hat{\Sigma}_\lambda^{-1/2}\|_{op}^2 &\leq \Delta_1 \\ \|\Sigma_\lambda^{-1/2} \left[ (\hat{\Sigma} w_\lambda - X^* \mathbf{y}) - (\Sigma w_\lambda - S^* f_{\mathcal{H}}) \right]\| &\leq \Delta_2 \\ \|\Sigma - \hat{\Sigma}\|_{op} \leq \|\Sigma - \hat{\Sigma}\|_{HS} &\leq \Delta_3 \end{aligned}$$

where

$$\begin{aligned}\Delta_1 &= 3 \\ \Delta_2 &= \left( \frac{C_1}{n\lambda^{\frac{1}{2}\vee(1-\zeta)}} + \sqrt{\frac{C_2\Phi(\lambda)^2}{n\lambda} + \frac{C_3\mathcal{N}(\lambda)}{n}} \right) \log \frac{2}{\delta} \\ \Delta_3 &= \frac{6\kappa^2}{\sqrt{n}} \log \frac{2}{\delta} .\end{aligned}$$

We now begin with the following inequality

$$\|L^{-a}S(\hat{w}_\lambda - w_\lambda)\|_{\rho_x} \leq \|L^{-a}S\Sigma_\lambda^{a-\frac{1}{2}}\|_{op} \left\| \Sigma_\lambda^{\frac{1}{2}-a} \hat{\Sigma}_\lambda^{a-\frac{1}{2}} \right\|_{op} \left\| \hat{\Sigma}_\lambda^{\frac{1}{2}-a}(\hat{w}_\lambda - w_\lambda) \right\|$$

where, thanks to spectral theorem and Cordes inequality, the first two terms can be controlled as follows:

$$\begin{aligned}\|L^{-a}S\Sigma_\lambda^{a-1/2}\|_{op} &\leq \|L^{-a}S\Sigma^{a-\frac{1}{2}}\|_{op} \leq 1 \\ \left\| \Sigma_\lambda^{\frac{1}{2}-a} \hat{\Sigma}_\lambda^{a-1/2} \right\|_{op} &= \left\| \Sigma_\lambda^{\frac{1}{2}(1-2a)} \hat{\Sigma}_\lambda^{-\frac{1}{2}(1-2a)} \right\|_{op} \leq \Delta_1^{\frac{1}{2}-a} .\end{aligned}$$

Now adding and subtracting the mixed-term  $\hat{\Sigma}_\lambda^{\frac{1}{2}-a} g_\lambda(\hat{\Sigma}) \hat{\Sigma} w_\lambda$  and using triangular inequality we obtain

$$\begin{aligned}\|L^{-a}S(\hat{w}_\lambda - w_\lambda)\|_{\rho_x} &\leq \Delta_1^{\frac{1}{2}-a} \left( \left\| \hat{\Sigma}_\lambda^{\frac{1}{2}-a} \left( \hat{w}_\lambda - g_\lambda(\hat{\Sigma}) \hat{\Sigma} w_\lambda \right) \right\| + \left\| \hat{\Sigma}_\lambda^{\frac{1}{2}-a} r_\lambda(\hat{\Sigma}) w_\lambda \right\| \right) \\ &= \Delta_1^{\frac{1}{2}-a} \left( \left\| \hat{\Sigma}_\lambda^{\frac{1}{2}-a} g_\lambda(\hat{\Sigma}) \left( X^* \mathbf{y} - \hat{\Sigma} w_\lambda \right) \right\| + \left\| \hat{\Sigma}_\lambda^{\frac{1}{2}-a} r_\lambda(\hat{\Sigma}) w_\lambda \right\| \right) .\end{aligned}\quad (39)$$

**Estimating**  $\left\| \hat{\Sigma}_\lambda^{\frac{1}{2}-a} g_\lambda(\hat{\Sigma}) \left( X^* \mathbf{y} - \hat{\Sigma} w_\lambda \right) \right\|$  :

We first have

$$\left\| \hat{\Sigma}_\lambda^{\frac{1}{2}-a} g_\lambda(\hat{\Sigma}) \left( X^* \mathbf{y} - \hat{\Sigma} w_\lambda \right) \right\| \leq \left\| \hat{\Sigma}_\lambda^{\frac{1}{2}-a} g_\lambda(\hat{\Sigma}) \hat{\Sigma}_\lambda^{\frac{1}{2}} \right\|_{op} \left\| \hat{\Sigma}_\lambda^{-\frac{1}{2}} \Sigma_\lambda^{\frac{1}{2}} \right\|_{op} \left\| \Sigma_\lambda^{-\frac{1}{2}} \left( X^* \mathbf{y} - \hat{\Sigma} w_\lambda \right) \right\| .$$

Now, thanks to the definition of regularization function  $g_\lambda$  and since  $\hat{\Sigma}$  is bounded by  $\kappa^2$

$$\begin{aligned}\left\| \hat{\Sigma}_\lambda^{\frac{1}{2}-a} g_\lambda(\hat{\Sigma}) \hat{\Sigma}_\lambda^{\frac{1}{2}} \right\|_{op} &\leq \sup_{u \in [0, \kappa^2]} |(u + \lambda)^{1-a} g_\lambda(u)| \\ &\leq \sup_{u \in [0, \kappa^2]} |(u^{1-a} + \lambda^{1-a}) g_\lambda(u)| \\ &\leq 2E' \lambda^{-a} .\end{aligned}$$

Thus we obtain

$$\left\| \hat{\Sigma}_\lambda^{\frac{1}{2}-a} g_\lambda(\hat{\Sigma}) \left( X^* \mathbf{y} - \hat{\Sigma} w_\lambda \right) \right\| \leq 2E' \lambda^{-a} \Delta_1^{\frac{1}{2}} \left\| \Sigma_\lambda^{-\frac{1}{2}} \left( \hat{\Sigma} w_\lambda - X^* \mathbf{y} \right) \right\| .$$

Now, adding and subtracting  $\Sigma_\lambda^{-\frac{1}{2}} (\Sigma w_\lambda - S^* f_{\mathcal{H}})$  we obtain

$$\begin{aligned}\left\| \Sigma_\lambda^{-\frac{1}{2}} \left( \hat{\Sigma} w_\lambda - X^* \mathbf{y} \right) \right\| &\leq \left\| \Sigma_\lambda^{-\frac{1}{2}} \left[ \left( \hat{\Sigma} w_\lambda - X^* \mathbf{y} \right) - (\Sigma w_\lambda - S^* f_{\mathcal{H}}) \right] \right\| + \left\| \Sigma_\lambda^{-\frac{1}{2}} (\Sigma w_\lambda - S^* f_{\mathcal{H}}) \right\| \\ &\leq \left\| \Sigma_\lambda^{-\frac{1}{2}} \left[ \left( \hat{\Sigma} w_\lambda - X^* \mathbf{y} \right) - (\Sigma w_\lambda - S^* f_{\mathcal{H}}) \right] \right\| + \left\| \Sigma_\lambda^{-\frac{1}{2}} S^* \right\|_{op} \|\Sigma w_\lambda - f_{\mathcal{H}}\| \\ &\leq \Delta_2 + c_g R \Phi(\lambda) ,\end{aligned}$$

where in the last inequality we use Lemma 2 and that  $\left\| \Sigma_\lambda^{-\frac{1}{2}} S^* \right\| \leq 1$ . We thus obtain that

$$\left\| \hat{\Sigma}_\lambda^{\frac{1}{2}-a} g_\lambda(\hat{\Sigma}) \left( X^* \mathbf{y} - \hat{\Sigma} w_\lambda \right) \right\| \leq 2E' \lambda^{-a} \Delta_1^{\frac{1}{2}} (\Delta_2 + c_g R \Phi(\lambda)) .\quad (40)$$



**Estimating**  $\left\| \hat{\Sigma}_\lambda^{\frac{1}{2}-a} r_\lambda(\hat{\Sigma}) w_\lambda \right\| :$

Note that from the definition of  $w_\lambda$  it holds that

$$w_\lambda = g_\lambda(\Sigma) S^* \Phi(L) g_0 = g_\lambda(\Sigma) \Phi(\Sigma) S^* g_0 ,$$

and thus,

$$\left\| \hat{\Sigma}_\lambda^{\frac{1}{2}-a} r_\lambda(\hat{\Sigma}) w_\lambda \right\| \leq R \left\| \hat{\Sigma}_\lambda^{\frac{1}{2}-a} r_\lambda(\hat{\Sigma}) g_\lambda(\Sigma) \Phi(\Sigma) S^* \right\|_{op} = R \left\| \hat{\Sigma}_\lambda^{\frac{1}{2}-a} r_\lambda(\hat{\Sigma}) g_\lambda(\Sigma) \Phi(\Sigma) \Sigma^{\frac{1}{2}} \right\|_{op} .$$

Now we have

$$\begin{aligned} \left\| \hat{\Sigma}_\lambda^{\frac{1}{2}-a} r_\lambda(\hat{\Sigma}) g_\lambda(\Sigma) \Phi(\Sigma) \Sigma^{\frac{1}{2}} \right\|_{op} &\leq \left\| \hat{\Sigma}_\lambda^{\frac{1}{2}-a} r_\lambda(\hat{\Sigma}) \hat{\Sigma}_\lambda^{\frac{1}{2}} \right\|_{op} \left\| \hat{\Sigma}_\lambda^{-\frac{1}{2}} \Sigma^{\frac{1}{2}} \right\|_{op} \left\| \Sigma^{-\frac{1}{2}} \Sigma^{\frac{1}{2}} \right\|_{op} \|g_\lambda(\Sigma) \Phi(\Sigma)\|_{op} \\ &\leq \Delta_1^{\frac{1}{2}} \left\| \hat{\Sigma}_\lambda^{1-a} r_\lambda(\hat{\Sigma}) \right\|_{op} \|g_\lambda(\Sigma) \Phi(\Sigma)\|_{op} . \end{aligned}$$

For the first term we get

$$\left\| \hat{\Sigma}_\lambda^{1-a} r_\lambda(\hat{\Sigma}) \right\| \leq \sup_{u \in [0, \kappa^2]} |(u + \lambda)^{1-a} r_\lambda(u)| \leq 2F'_q \lambda^{1-a} ,$$

while for the second term we have

$$\|g_\lambda(\Sigma) \Phi(\Sigma)\|_{op} \leq \sup_{u \in [0, \kappa^2]} |g_\lambda(u) \Phi(u)| .$$

Now if  $0 < u \leq \lambda$ , as  $\Phi(u)$  is non-decreasing,  $\Phi(u) \leq \Phi(\lambda)$ , hence by (9) we obtain

$$g_\lambda(u) \Phi(u) \leq E' \Phi(\lambda) \lambda^{-1} .$$

When  $\lambda \leq u \leq \kappa^2$ , following from Lemma 9, there is a constant  $c'_\Phi \geq 1$  such that

$$\Phi(u) u^{-1} \leq c'_\Phi \Phi(\lambda) \lambda^{-1} ,$$

thus, by (9), we get

$$g_\lambda(u) \Phi(u) = g_\lambda(u) u \Phi(u) u^{-1} \leq E' c'_\Phi \Phi(\lambda) \lambda^{-1} .$$

Therefore for all  $0 < u \leq \kappa^2$ ,  $g_\lambda(u) \Phi(u) \leq E' c'_\Phi \Phi(\lambda) \lambda^{-1}$  and we can conclude that

$$\left\| \hat{\Sigma}_\lambda^{\frac{1}{2}-a} r_\lambda(\hat{\Sigma}) w_\lambda \right\|_{op} \leq 2R \Delta_1^{\frac{1}{2}} F'_q E' c'_\Phi \Phi(\lambda) \lambda^{-a} . \quad (41)$$

### Learning bounds

We are now ready to state the learning bound related to the regularized solution  $\hat{w}_\lambda = g_\lambda(\hat{\Sigma}) X^* \mathbf{y}$ . By combining (37), (38), (39), (40), (41) we obtain that with probability at least  $1 - \delta$

$$\begin{aligned} \|L^{-a} (S\hat{w}_\lambda - f_{\mathcal{H}})\|_{\rho_{\mathcal{X}}} &\leq c_g R \Phi(\lambda) \lambda^{-a} \\ &\quad + \Delta_1^{1-a} 2E' (\Delta_2 + c_g R \Phi(\lambda)) \lambda^{-a} \\ &\quad + \Delta_1^{1-a} 2R F'_q E' c'_\Phi \Phi(\lambda) \lambda^{-a} . \end{aligned}$$

Since

$$\Delta_2 \leq \left( \frac{C_1}{n \lambda^{\frac{1}{2} \vee (1-\zeta)}} + \sqrt{\frac{C_2 \Phi(\lambda)^2}{n \lambda}} + \sqrt{\frac{C_3 \mathcal{N}(\lambda)}{n}} \right) \log \frac{2}{\delta}$$

and  $\log \frac{2}{\delta} \geq 1$  for all  $\delta \in (0, 1/2)$ , we can rewrite the above inequality as

$$\|L^{-a} (S\hat{w}_\lambda - f_{\mathcal{H}})\|_{\rho_{\mathcal{X}}} \leq \lambda^{-a} \left( \frac{\tilde{C}_1}{n \lambda^{\frac{1}{2} \vee (1-\zeta)}} + \left( \tilde{C}_2 + \frac{\tilde{C}_3}{\sqrt{n \lambda}} \right) \Phi(\lambda) + \tilde{C}_4 \sqrt{\frac{\mathcal{N}(\lambda)}{n}} \right) \log \frac{2}{\delta}$$

where

$$\begin{aligned} \tilde{C}_1 &= 2\Delta_1^{1-a} E' C_1 = 16 \, 3^{1-a} E' \left( \kappa M + \kappa^2 E' \Phi(\kappa^2) \kappa^{-(2\zeta \wedge 1)} \right) \\ \tilde{C}_2 &= c_g R + 2\Delta_1^{1-a} E' R (c_g + c'_\Phi F'_q) \\ \tilde{C}_3 &= 2\sqrt{C_2} \Delta_1^{1-a} E' = 2\sqrt{96 c_g^2 R^2 \kappa^2 3^{1-a} E'} \\ \tilde{C}_4 &= 2\sqrt{C_3} \Delta_1^{1-a} E' = 2\sqrt{32(3B^2 + 4Q^2) 3^{1-a} E'} . \end{aligned}$$

which complete the proof of the first part of the thesis.  
Computing the square of the previous we have

$$\|L^{-a}(S\hat{w}_\lambda - f_{\mathcal{H}})\|_{\rho_x}^2 \leq 3\lambda^{-2a} \left[ \left( \frac{\tilde{C}_1}{n\lambda^{\frac{1}{2}\vee(1-\zeta)}} \right)^2 + \left( \tilde{C}_2 + \frac{\tilde{C}_3}{\sqrt{n\lambda}} \right)^2 \Phi(\lambda)^2 + \left( \tilde{C}_4 \sqrt{\frac{\mathcal{N}(\lambda)}{n}} \right)^2 \right] \log^2 \frac{2}{\delta}.$$

Assuming  $\lambda$  to be of the order  $O(n^{-\theta})$ , for some  $\theta \in (0, 1)$ , then

$$\lim_{n \rightarrow \infty} \frac{1}{n\lambda} = 0, \quad \lim_{n \rightarrow \infty} \Phi(\lambda) = 0,$$

thus, assuming  $n$  to be large enough, we can ignore the second order terms, hence we have that for some positive constant  $C$  which does not depend on  $n, \lambda, \delta$ , it holds true that

$$\|L^{-a}(S\hat{w}_\lambda - f_{\mathcal{H}})\|_{\rho_x}^2 \leq C\lambda^{-2a} \left( \Phi(\lambda)^2 + \frac{\mathcal{N}(\lambda)}{n} \right) \log^2 \frac{2}{\delta}. \quad (42)$$

Now if we assume Holder condition  $\Phi(u) = u^r$  and  $\mathcal{N}(\lambda) \leq c_\gamma \lambda^{-\frac{1}{\gamma}}$  then (42) implies

$$\|L^{-a}(S\hat{w}_\lambda - f_{\mathcal{H}})\|_{\rho_x}^2 \leq C\lambda^{-2a} \left( \lambda^{2r} + \frac{\lambda^{-\frac{1}{\gamma}}}{n} \right) \log^2 \frac{2}{\delta}.$$

By balancing the two terms

$$\lambda^{2r} = \frac{\lambda^{-\frac{1}{\gamma}}}{n}$$

we get the choice for the regularization parameter

$$\lambda = O(n^{-\frac{\gamma}{2\gamma r + 1}})$$

which in the case  $a = 0$  directly implies (29). □

## 8.5 Proof of Theorem 1 and 2

*Proof.*

Both Theorem 1 and 2 follow from Theorem 4 by choosing  $\lambda = \frac{1}{t}$  for gradient descent and  $\lambda = \frac{1}{t^2}$  for accelerated methods.

However in the estimation of the term  $\left\| \hat{\Sigma}_\lambda^{\frac{1}{2}-a} r_\lambda(\hat{\Sigma}) w_\lambda \right\|$  of the stability (39) we use the the fact that the qualification of the method is at least 1. We can obtain the same result for Nesterov method by assuming furthermore that the parameter  $r$  of the source condition to be larger than 1/2. We have

$$\left\| \hat{\Sigma}_\lambda^{\frac{1}{2}} r_\lambda(\hat{\Sigma}) w_\lambda \right\| \leq \left\| \hat{\Sigma}_\lambda^{\frac{1}{2}} r_\lambda(\hat{\Sigma}) \right\|_{op} \|w_\lambda\| = \left\| \left( \hat{\Sigma} + \lambda I \right)^{\frac{1}{2}} r_\lambda(\hat{\Sigma}) \right\|_{op} \|w_\lambda\|.$$

Thanks to the source condition we have that the norm  $w_\lambda$  is bounded

$$\|w_\lambda\| = \|g_\lambda(\Sigma) \Sigma^r S^* g_0\| \leq \left\| g_\lambda(\Sigma) \Sigma^{r+\frac{1}{2}} \right\|_{op} \|g_0\| \leq \kappa^{2r-1} E' \|g_0\|.$$

On the other hand

$$\left\| \hat{\Sigma}_\lambda^{\frac{1}{2}} r_\lambda(\hat{\Sigma}) \right\|_{op} \leq \sup_{u \in [0, \kappa^2]} \left| \left( \sqrt{u + \lambda} \right) r_\lambda(u) \right| \leq 2F'_q \lambda^{1/2}.$$

This complete the proof. □
